# Supplementary material for: Polymer-supported eosin Y as a reusable photocatalyst for visible light mediated organic transformations
Source: Royal Society of Chemistry journal article supplement (doi:10.1039/c9nj04064a), 2019-01-01
Supplement: c9nj04064a1.pdf [file c9nj04064a1.pdf]

## **Supporting Information**

### **Polymer supported eosin Y as a reusable photocatalyst for the visible light mediated organic transformations.**

**Arunasalam Sridhar, Rajmohan Rangasamy, Mari Selvaraj\***

**Guru Nanak College (Autonomous), Velachery, Chennai – 600042.**

### **Contents**

|                                                                            |       |
|----------------------------------------------------------------------------|-------|
| 1. Determination of molar extinction coefficient of eosin Y in water       | 2-3   |
| 2. IR spectra of eosin Y and polymer supported eosin Y                     | 3     |
| 3. Spectral data of sulfoxide and phenol derivatives                       | 4-9   |
| 4. Copies of $^1\text{H}$ and $^{13}\text{C}$ NMR spectra of all compounds | 10-39 |

## Determination of molar extinction coefficient of eosin Y in water

The absorption spectrum of different concentrations of Na<sub>2</sub>eosin Y in water were recorded as shown in figure 1 and Na<sub>2</sub>eosin Y shows absorption maximum at 517 nm. The extinction coefficient of Na<sub>2</sub>eosin Y was calculated from the plot of absorbance vs concentration as shown in figure 2. The extinction coefficient was found to be  $7.4 \times 10^5 \text{ M}^{-1}\text{cm}^{-1}$ . Correlation coefficient ( $R^2$ ) is 0.999.

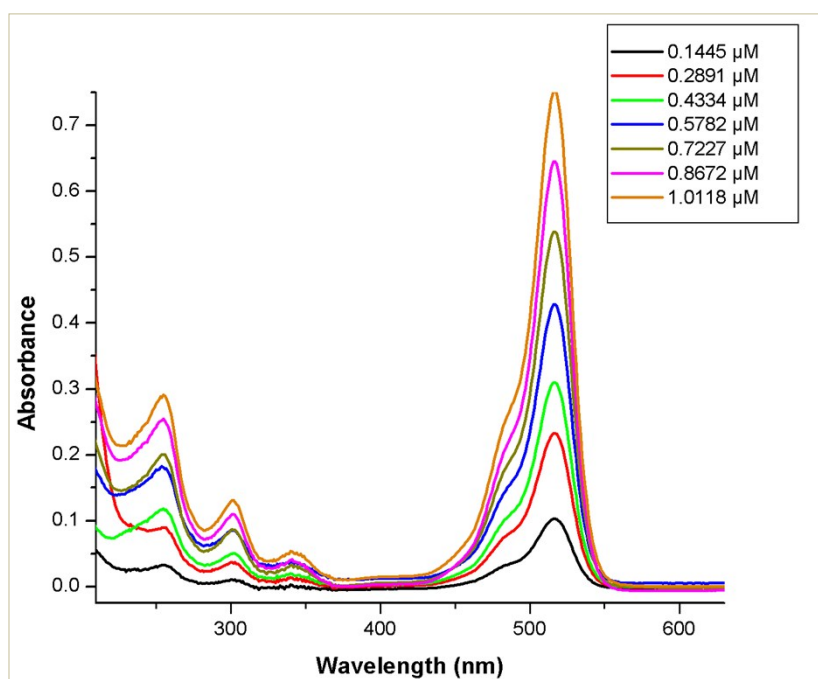

**Figure 1** Absorption spectra of Na<sub>2</sub>eosin Y in aqueous solution with different concentration.

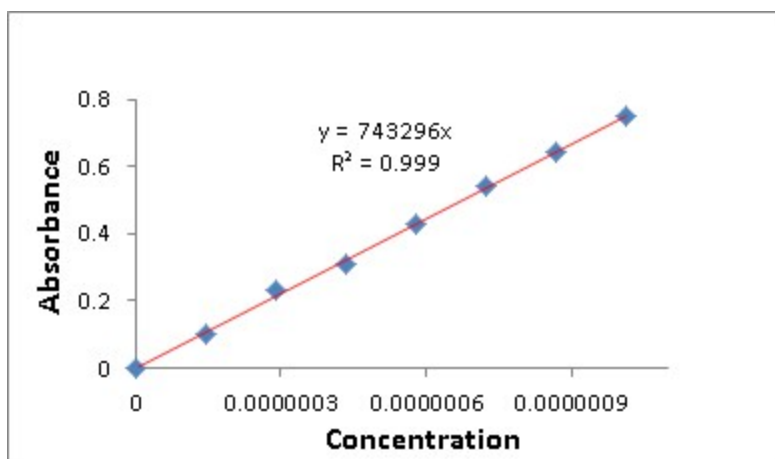

**Figure 2** Plot of absorbance vs concentration of aqueous solution of Na<sub>2</sub>eosin Y at 517 nm.

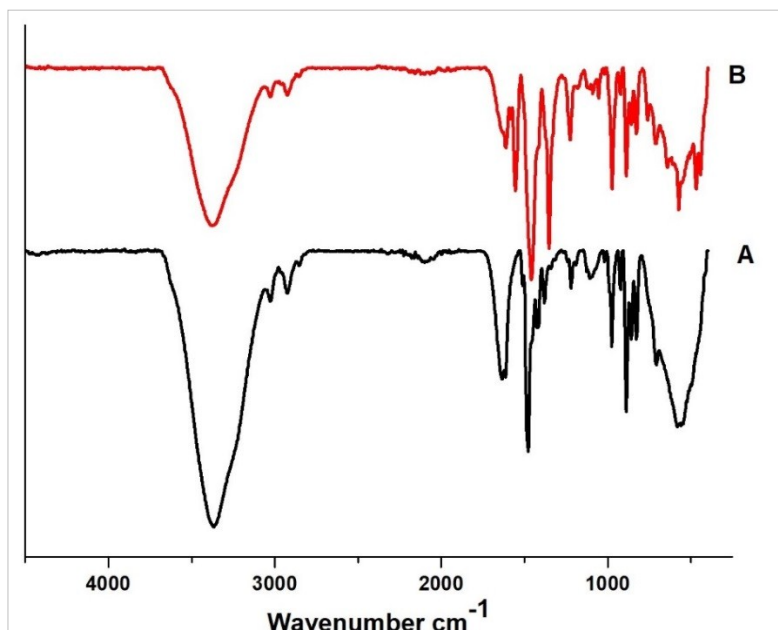

**Figure 3.** (A) IR spectra of eosin Y. (B) polymer-supported eosin Y.

Polymer supported eosin Y shows most of the IR peaks of eosin Y which confirms that the eosin y is immobilized on the polymer. The stretching frequency around 1610 cm<sup>-1</sup> corresponding to carbonyl group present in carboxylate anion which decreased significantly in polymer supported eosin Y due to anion-exchange reaction.

## Spectral data of sulfoxide and phenol derivatives

**methylsulfinylbenzene 2a:** pale yellow oil;  $^1\text{H}$  NMR (400 MHz,  $\text{CDCl}_3$ )  $\delta$  7.64 (d,  $J = 7.2$  Hz,

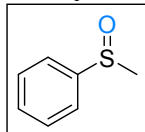

2H), 7.54 – 7.46 (m, 3H), 2.71 (s, 3H) ppm;  $^{13}\text{C}$  NMR (100 MHz,  $\text{CDCl}_3$ )  $\delta$  145.5, 130.9, 129.2, 123.4, 43.8 ppm.

**1-methyl-4-(methylsulfinyl)benzene 2b:** colorless oil;  $^1\text{H}$  NMR (400 MHz,  $\text{CDCl}_3$ )  $\delta$  7.54 (d,  $J$

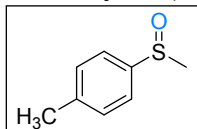

= 8.0 Hz, 2H), 7.3 (d,  $J = 8.0$  Hz, 2H), 2.69 (s, 3H), 2.41 (s, 3H) ppm;  $^{13}\text{C}$  NMR (100 MHz,  $\text{CDCl}_3$ )  $\delta$  142.4, 141.5, 130.0, 123.5, 43.9, 21.3 ppm.

**1-methoxy-4-(methylsulfinyl)benzene 2c:** pale yellow oil;  $^1\text{H}$  NMR (500 MHz,  $\text{CDCl}_3$ )  $\delta$  7.58

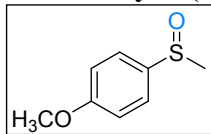

(d,  $J = 9.0$  Hz, 2H), 7.02 (d,  $J = 9.0$  Hz, 2H), 3.83 (s, 3H), 2.68 (s, 3H) ppm;  $^{13}\text{C}$  NMR (125 MHz,  $\text{CDCl}_3$ )  $\delta$  161.9, 136.4, 125.4, 114.8, 55.4, 43.9 ppm.

**4-(methylsulfinyl)benzonitrile 2d:** white solid; mp 87-89 °C;  $^1\text{H}$  NMR (500 MHz,  $\text{CDCl}_3$ )  $\delta$

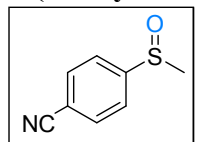

7.83 – 7.80 (m, 2H), 7.72 – 7.74 (m, 2H), 2.74 (s, 3H) ppm;  $^{13}\text{C}$  NMR (125 MHz,  $\text{CDCl}_3$ )  $\delta$  151.4, 132.9, 124.2, 117.6, 114.7, 43.7 ppm.

**1-(methylsulfinyl)-4-nitrobenzene 2e:** yellow solid; mp 150-153 °C;  $^1\text{H}$  NMR (500 MHz,

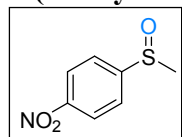

$\text{CDCl}_3$ )  $\delta$  8.30 (d,  $J = 8.5$  Hz, 2H), 7.84 (d,  $J = 9.0$  Hz, 2H), 2.78 (s, 3H) ppm;  $^{13}\text{C}$  NMR (125 MHz,  $\text{CDCl}_3$ )  $\delta$  153.2, 149.4, 124.6, 124.4, 43.8 ppm.

**ethylsulfinylbenzene 2f:** pale yellow oil;  $^1\text{H}$  NMR (500 MHz,  $\text{CDCl}_3$ )  $\delta$  7.59 – 7.57 (m, 2H),

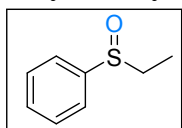

7.50 – 7.46 (m, 3H), 2.91 – 2.84 (m, 1H), 2.77 – 2.70 (m, 1H), 1.18 (t,  $J = 7.5$  Hz, 3H) ppm;  $^{13}\text{C}$  NMR (125 MHz,  $\text{CDCl}_3$ )  $\delta$  130.8, 129.0, 124.0, 50.1, 5.87

ppm.

**isopropylsulfinylbenzene 2g:** colorless oil;  $^1\text{H}$  NMR (500 MHz,  $\text{CDCl}_3$ )  $\delta$  7.58 – 7.56 (m, 2H),

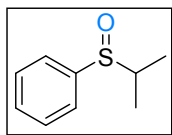

7.51 – 7.47 (m, 3H), 2.85 (sept,  $J = 7.0$  Hz, 1H), 1.21 (d,  $J = 7.0$  Hz, 3H), 1.13 (d,  $J = 7.0$  Hz, 3H) ppm;  $^{13}\text{C}$  NMR (125 MHz,  $\text{CDCl}_3$ )  $\delta$  141.6, 130.9, 128.8, 124.9,

54.4, 15.8, 13.8 ppm.

**benzylsulfinylbenzene 2h:** white solid; mp 121-123 °C;  $^1\text{H}$  NMR (500 MHz,  $\text{CDCl}_3$ )  $\delta$  7.47 –

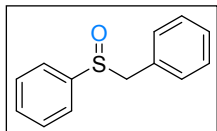

7.39 (m, 5H), 7.38 – 7.36 (m, 3H), 7.29 – 7.22 (m, 2H), 4.09 (d,  $J = 12.5$  Hz, 1H), 4.00 (d,  $J = 12.5$  Hz, 1H) ppm;  $^{13}\text{C}$  NMR (125 MHz,  $\text{CDCl}_3$ )  $\delta$  142.6,

131.0, 130.2, 129.0, 128.7, 128.3, 128.1, 124.3, 63.4 ppm.

**4-(methylsulfinyl)benzaldehyde 2i:** white solid; mp 80-82 °C;  $^1\text{H}$  NMR (400 MHz,  $\text{CDCl}_3$ )  $\delta$

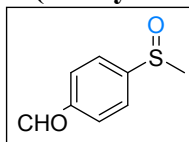

10.06 (s, 1H), 8.03 (d,  $J = 8.0$  Hz, 2H), 7.81 (d,  $J = 8.4$  Hz, 2H), 2.76 (s, 3H) ppm;  $^{13}\text{C}$  NMR (100 MHz,  $\text{CDCl}_3$ )  $\delta$  191.1, 152.3, 138.0, 130.3, 124.0, 43.7

ppm.

**1-bromo-4-(methylsulfinyl)benzene 2j:** white solid; mp 81-83 °C;  $^1\text{H}$  NMR (500 MHz,

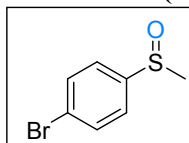

$\text{CDCl}_3$ )  $\delta$  7.66 (d,  $J = 8.5$  Hz, 2H), 7.52 (d,  $J = 8.5$  Hz, 2H), 2.70 (s, 3H) ppm;  $^{13}\text{C}$  NMR (125 MHz,  $\text{CDCl}_3$ )  $\delta$  144.8, 132.5, 125.4, 125.1, 43.9 ppm.

**1-chloro-4-(methylsulfinyl)benzene 2k:** pale yellow oil;  $^1\text{H}$  NMR (500 MHz,  $\text{CDCl}_3$ )  $\delta$  7.58

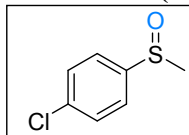

(d,  $J = 8.5$  Hz, 2H), 7.50 (d,  $J = 9.0$  Hz, 2H), 2.70 (s, 3H) ppm;  $^{13}\text{C}$  NMR (125 MHz,  $\text{CDCl}_3$ )  $\delta$  144.1, 137.1, 129.5, 124.9, 43.9 ppm.

**1,3-dichloro-2-(methylsulfinyl)benzene 2l:** white solid; mp 71-74 °C;  $^1\text{H}$  NMR (500 MHz,

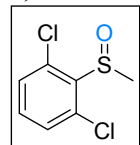

$\text{CDCl}_3$ )  $\delta$  7.91 – 7.90 (m, 1H), 7.40 – 7.38 (m, 1H), 7.32 (d,  $J = 8.5$  Hz, 1H), 2.81 (s, 3H) ppm;  $^{13}\text{C}$  NMR (125 MHz,  $\text{CDCl}_3$ )  $\delta$  145.3, 134.8, 132.0, 130.9, 127.7,

125.4, 41.4 ppm.

**1-iodo-2-(methylsulfinyl)benzene 2m:** pale yellow oil;  $^1\text{H}$  NMR (500 MHz,  $\text{CDCl}_3$ )  $\delta$  7.91 (dd,

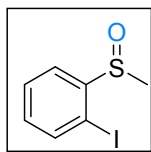

$J = 7.8$  Hz, 1.6 Hz, 1H), 7.81 (dd,  $J = 7.8$  Hz, 1.0 Hz, 1H), 7.62 (t,  $J = 7.5$  Hz, 1H),  
7.23 (td,  $J = 7.6$  Hz, 1.6 Hz, 1H), 2.78 (s, 3H) ppm;  $^{13}\text{C}$  NMR (125 MHz,  $\text{CDCl}_3$ )  $\delta$

148.2, 139.3, 132.4, 129.5, 125.7, 91.3, 42.1 ppm.

**Sulfinyldibenzene 2n:** pale yellow solid; mp 68-71  $^\circ\text{C}$ ;  $^1\text{H}$  NMR (400 MHz,  $\text{CDCl}_3$ )  $\delta$  7.65 –

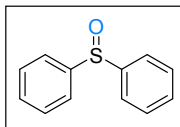

7.63 (m, 4H), 7.48 – 7.43 (m, 6H) ppm;  $^{13}\text{C}$  NMR (100 MHz,  $\text{CDCl}_3$ )  $\delta$  145.4,  
131.0, 129.3, 124.7 ppm.

**2-(methylsulfinyl)naphthalene 2o:** white solid; mp 105-107  $^\circ\text{C}$ ;  $^1\text{H}$  NMR (500 MHz,  $\text{CDCl}_3$ )  $\delta$

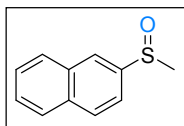

8.21 (s, 1H), 7.99 (d,  $J = 8.5$  Hz, 1H), 7.94 – 7.89 (m, 2H), 7.60 – 7.58 (m, 3H),  
2.79 (s, 3H) ppm;  $^{13}\text{C}$  NMR (125 MHz,  $\text{CDCl}_3$ )  $\delta$  142.6, 134.3, 132.8, 129.5,

128.4, 128.0, 127.7, 127.3, 124.0, 119.4, 43.7 ppm.

**Phenol 4a:** colorless oil;  $^1\text{H}$  NMR (400 MHz,  $\text{CDCl}_3$ )  $\delta$  7.27 – 7.24 (m, 2H), 6.96 (t,  $J = 7.2$  Hz,

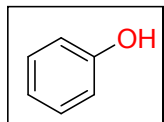

1H), 6.86 (d,  $J = 8.0$  Hz, 2H), 5.07 (brs, 1H) ppm;  $^{13}\text{C}$  NMR (100 MHz,  $\text{CDCl}_3$ )  $\delta$   
155.5, 129.6, 120.7, 115.2 ppm.

**2-ethylphenol 4b:** pale yellow oil;  $^1\text{H}$  NMR (500 MHz,  $\text{CDCl}_3$ )  $\delta$  7.17 (d,  $J = 7.5$  Hz, 1H), 7.11

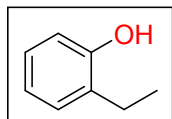

(t,  $J = 7.5$  Hz, 1H), 6.92 (t,  $J = 7.5$  Hz, 1H), 6.78 (d,  $J = 8.0$  Hz, 1H), 4.96 (brs,  
1H), 2.69 (q,  $J = 7.5$  Hz, 2H), 1.28 (t,  $J = 7.5$  Hz, 3H) ppm;  $^{13}\text{C}$  NMR (125 MHz,

$\text{CDCl}_3$ )  $\delta$  153.3, 129.9, 129.2, 126.9, 120.8, 115.1, 22.8, 13.9 ppm.

**3, 4-dimethylphenol 4c:** white solid; mp 59-62  $^\circ\text{C}$ ;  $^1\text{H}$  NMR (500 MHz,  $\text{CDCl}_3$ )  $\delta$  7.00 (d,  $J =$

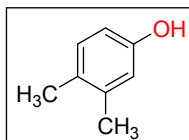

8.0 Hz, 1H), 6.66 (d,  $J = 3.0$  Hz, 1H), 6.60 (dd,  $J = 8.0$  Hz, 2.5 Hz, 1H), 4.84  
(brs, 1H), 2.22 (s, 3H), 2.19 (s, 3H) ppm;  $^{13}\text{C}$  NMR (125 MHz,  $\text{CDCl}_3$ )  $\delta$  153.3,

137.9, 130.4, 128.6, 116.5, 112.3, 19.8, 18.7 ppm.

**2-methoxyphenol 4d:** colorless oil;  $^1\text{H}$  NMR (500 MHz,  $\text{CDCl}_3$ )  $\delta$  6.94 – 6.92 (m, 1H), 6.89 –

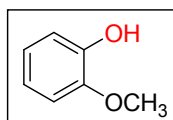

6.85 (m, 3H), 5.63 (brs, 1H), 3.89 (s, 3H) ppm;  $^{13}\text{C}$  NMR (125 MHz,  $\text{CDCl}_3$ )  $\delta$  146.5, 145.6, 121.4, 120.1, 114.4, 110.6, 55.8 ppm.

**4-hydroxybenzamide 4e:** white solid; mp 162-164 °C;  $^1\text{H}$  NMR (500 MHz,  $\text{DMSO-d}_6$ )  $\delta$  9.93

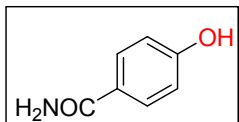

(s, 1H), 7.74 (t,  $J$  = 8.5 Hz, 3H), 7.04 (s, 1H), 6.78 (d,  $J$  = 8.5 Hz, 2H) ppm;  $^{13}\text{C}$  NMR (125 MHz,  $\text{DMSO-d}_6$ )  $\delta$  168.2, 160.6, 129.9, 125.4, 115.1 ppm.

**4-hydroxybenzonitrile 4f:** yellowish semi solid;  $^1\text{H}$  NMR (500 MHz,  $\text{CDCl}_3$ )  $\delta$  8.01 (s, 1H),

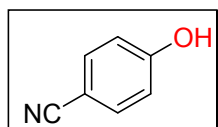

7.53 (d,  $J$  = 9.0 Hz, 2H), 6.93 (d,  $J$  = 8.5 Hz, 2H) ppm;  $^{13}\text{C}$  NMR (125 MHz,  $\text{CDCl}_3$ )  $\delta$  160.4, 134.2, 119.3, 116.4, 102.8 ppm.

**4-hydroxybenzaldehyde 4g:** yellow solid; mp 112-115 °C;  $^1\text{H}$  NMR (400 MHz,  $\text{CDCl}_3$ )  $\delta$  9.84

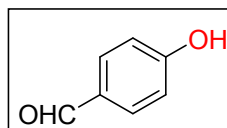

(s, 1H), 7.82 (d,  $J$  = 8.4 Hz, 2H), 6.99 – 6.97 (m, 3H) ppm;  $^{13}\text{C}$  NMR (100 MHz,  $\text{CDCl}_3$ )  $\delta$  191.5, 162.1, 132.6, 130.8, 116.0 ppm.

**2-hydroxybenzaldehyde 4h:** pale yellow oil;  $^1\text{H}$  NMR (400 MHz,  $\text{CDCl}_3$ )  $\delta$  11.01 (s, 1H), 9.90

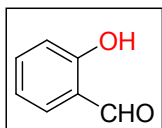

(s, 1H), 7.57 – 7.51 (m, 2H), 7.04 – 6.98 (m, 2H) ppm;  $^{13}\text{C}$  NMR (100 MHz,  $\text{CDCl}_3$ )  $\delta$  196.5, 161.6, 136.9, 133.7, 119.8, 117.6 ppm.

**3-bromophenol 4i:** pale yellow oil;  $^1\text{H}$  NMR (500 MHz,  $\text{CDCl}_3$ )  $\delta$  7.11-7.05 (m, 2H), 7.02 (t,  $J$

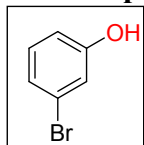

= 3.0 Hz, 1H), 6.78 – 6.75 (m, 1H), 5.31 (brs, 1H) ppm;  $^{13}\text{C}$  NMR (125 MHz,  $\text{CDCl}_3$ )  $\delta$  156.3, 130.7, 123.9, 122.7, 118.8, 114.2 ppm.

**2-fluoro-3-methoxyphenol 4j:** pale yellow oil;  $^1\text{H}$  NMR (400 MHz,  $\text{CDCl}_3$ )  $\delta$  6.94 (t,  $J$  = 8.4

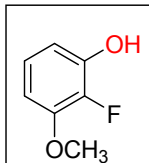

Hz, 1H), 6.63 (t,  $J$  = 7.6 Hz, 1H), 6.54 (t,  $J$  = 7.6 Hz, 1H), 5.54 (brs, 1H), 3.87 (s,

3H) ppm;  $^{13}\text{C}$  NMR (100 MHz,  $\text{CDCl}_3$ )  $\delta$  148.1, 144.4, 140.3, 123.6, 109.5, 104.9, 56.3 ppm.

**4-(benzyloxy)-2-fluorophenol 4k:** white solid; mp 58-61 °C;  $^1\text{H}$  NMR (500 MHz,  $\text{CDCl}_3$ )  $\delta$

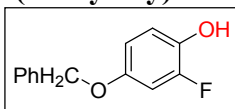

7.42-7.37 (m, 4H), 7.34-7.31 (s, 1H), 6.92 (t,  $J = 9.0$  Hz, 1H), 6.76 (dd,  $J =$

12.0 Hz, 2.5 Hz, 1H), 6.67 (d,  $J = 9.0$  Hz, 1H), 4.99 (s, 2H), 4.87 (brs, 1H) ppm;  $^{13}\text{C}$  NMR (125

MHz,  $\text{CDCl}_3$ )  $\delta$  152.6, 152.5, 151.8, 149.9, 137.6, 137.4, 136.6, 128.5, 128.0, 127.4, 117.2,

110.9, 103.4, 103.3, 70.8 ppm.

**Benzofuran-5-ol 4l:** white solid; mp 56-58 °C;  $^1\text{H}$  NMR (400 MHz,  $\text{CDCl}_3$ )  $\delta$  7.59 (s, 1H), 7.36

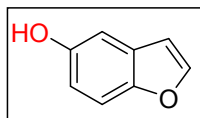

(d,  $J = 8.8$  Hz, 1H), 7.02 (s, 1H), 6.84 (d,  $J = 8.8$  Hz, 1H), 6.66 (s, 1H), 5.42

(brs, 1H) ppm;  $^{13}\text{C}$  NMR (100 MHz,  $\text{CDCl}_3$ )  $\delta$  151.3, 149.9, 145.9, 128.2,

112.9, 111.7, 106.4, 106.1 ppm.

**Naphthalen-2-ol 4m:** brownish solid; mp 121-124 °C;  $^1\text{H}$  NMR (500 MHz,  $\text{CDCl}_3$ )  $\delta$  7.79 (t,  $J$

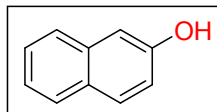

= 10.0 Hz, 2H), 7.69 (d,  $J = 8.5$  Hz, 1H), 7.45 (t,  $J = 8.0$  Hz, 1H), 7.35 (t,  $J =$

8.0 Hz, 1H), 7.15 (d,  $J = 2.5$  Hz, 1H), 7.12 (d,  $J = 2.5$  Hz, 1H), 7.11 (d,  $J =$

3.0 Hz, 1H), 5.34 (brs, 1H) ppm;  $^{13}\text{C}$  NMR (125 MHz,  $\text{CDCl}_3$ )  $\delta$  153.2, 134.5, 129.8, 128.9,

127.7, 126.5, 126.3, 123.6, 117.7, 109.4 ppm.

**Pyren-1-ol 4n:** white solid; mp 178-180 °C;  $^1\text{H}$  NMR (400 MHz,  $\text{DMSO-d}_6$ )  $\delta$  8.34 (d,  $J = 9.2$

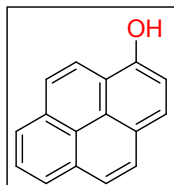

Hz, 1H), 8.06 (t,  $J = 7.6$  Hz, 3H), 7.97-7.89 (m, 3H), 7.83 (d,  $J = 8.8$  Hz, 1H),

7.57 (d,  $J = 8.4$  Hz, 1H), 5.59 (brs, 1H) ppm;  $^{13}\text{C}$  NMR (100 MHz,  $\text{DMSO-d}_6$ )  $\delta$

152.5, 131.7, 127.6, 126.29, 126.2, 125.8, 125.6, 124.9, 124.0, 123.9, 123.7,

121.8, 118.5, 113.5 ppm.

**Biphenyl-3-ol 4o:** white solid; mp 76-79 °C;  $^1\text{H}$  NMR (400 MHz,  $\text{CDCl}_3$ )  $\delta$  7.58 (d,  $J = 7.2$  Hz,

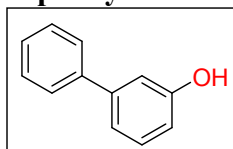

2H), 7.45 (t,  $J = 7.2$  Hz, 2H), 7.37-7.29 (m, 2H), 7.18 (d,  $J = 7.6$  Hz, 1H),



7.07 (s, 1H), 6.84 (d,  $J = 8.0$  Hz, 1H), 5.18 (brs, 1H) ppm;  $^{13}\text{C}$  NMR (100 MHz,  $\text{CDCl}_3$ )  $\delta$  155.8, 142.9, 140.7, 129.9, 128.7, 127.4, 127.0, 119.7, 114.1, 114.0 ppm.

**Copies of  $^1\text{H}$  and  $^{13}\text{C}$  NMR spectra of all compounds**

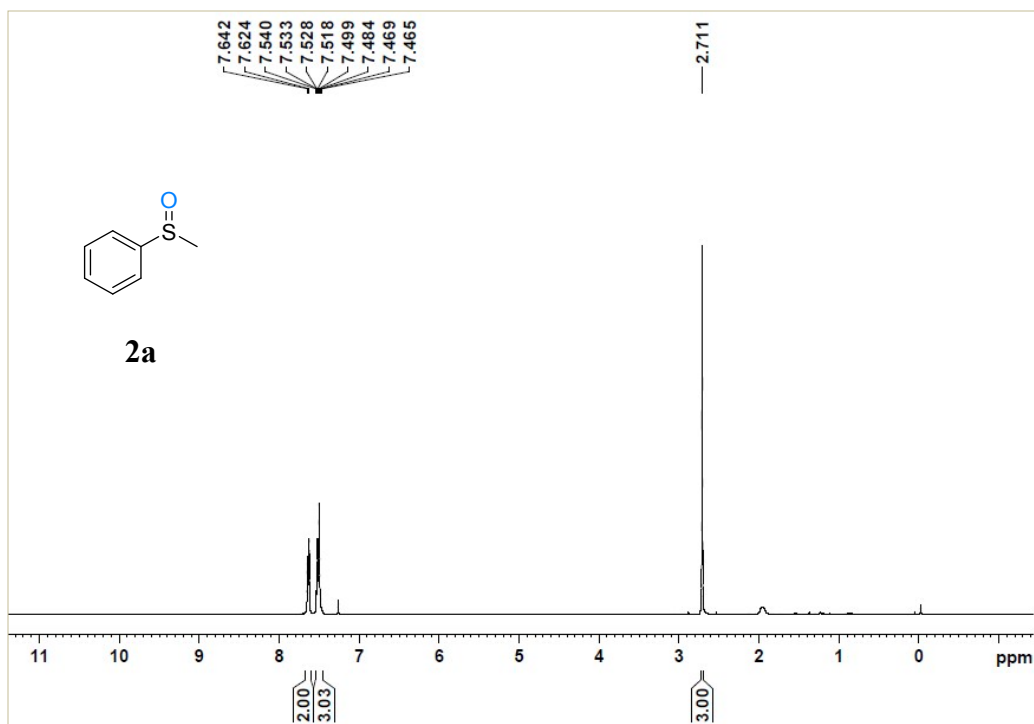

400 MHz  $^1\text{H}$  NMR spectrum of **2a** in  $\text{CDCl}_3$

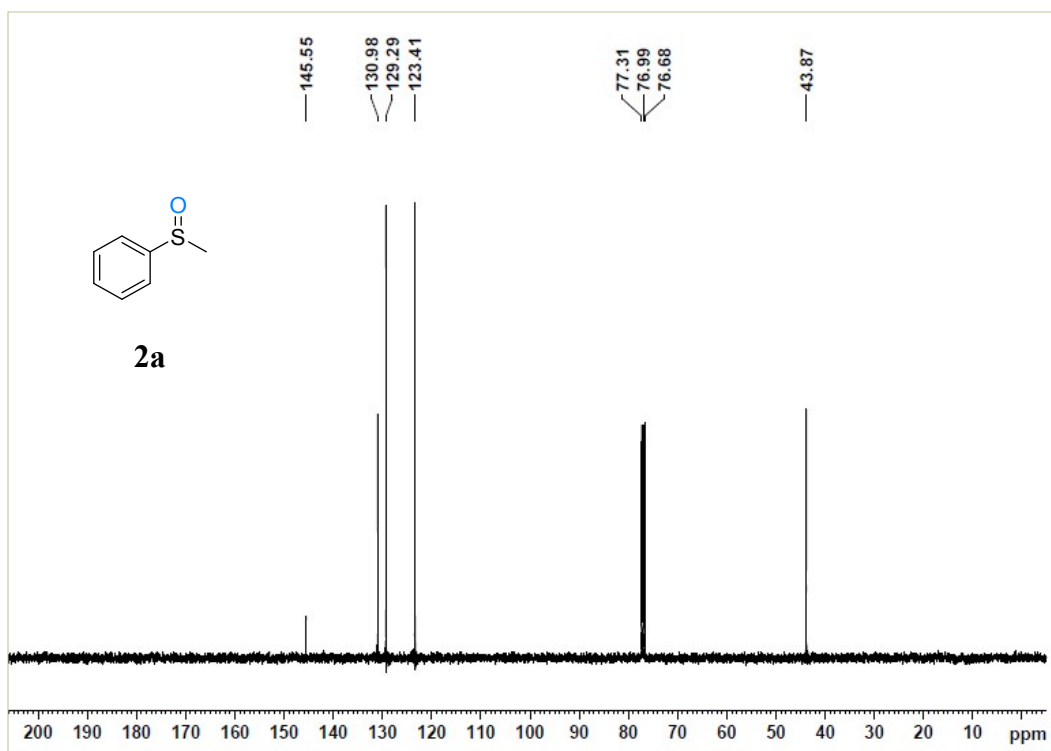

100 MHz  $^{13}\text{C}$ -NMR spectrum of **2a** in  $\text{CDCl}_3$

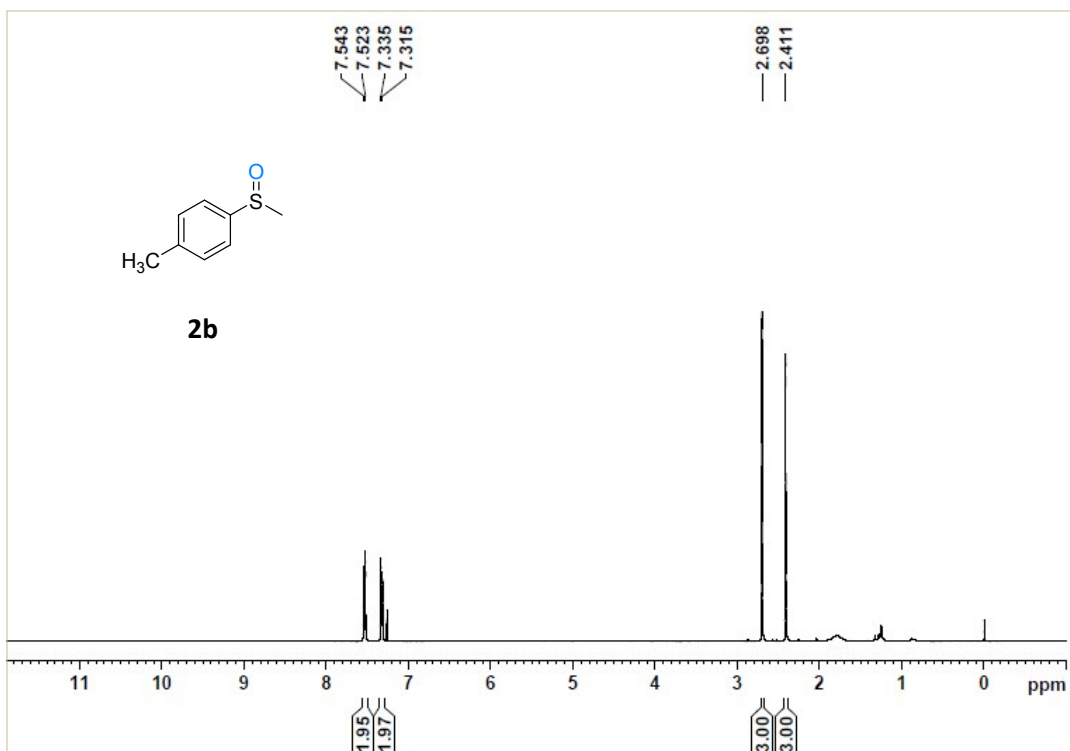

400 MHz  $^1\text{H}$  NMR spectrum of **2b** in  $\text{CDCl}_3$

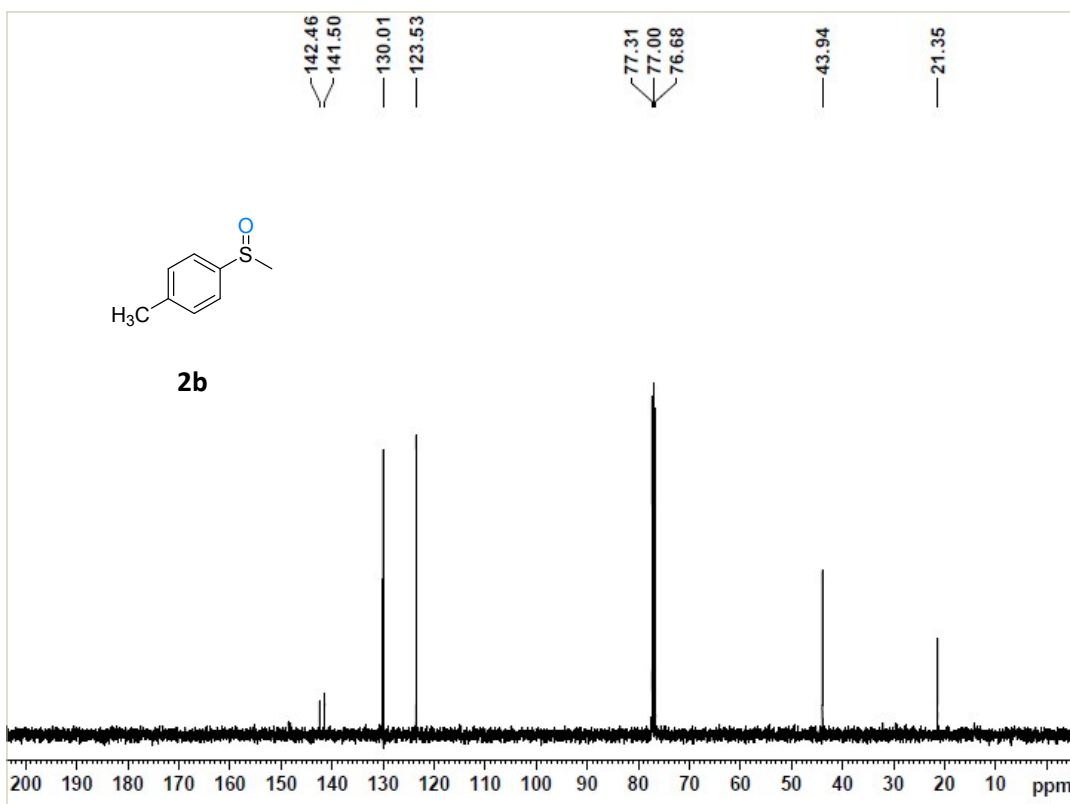

100 MHz  $^{13}\text{C}$ -NMR spectrum of **2b** in  $\text{CDCl}_3$

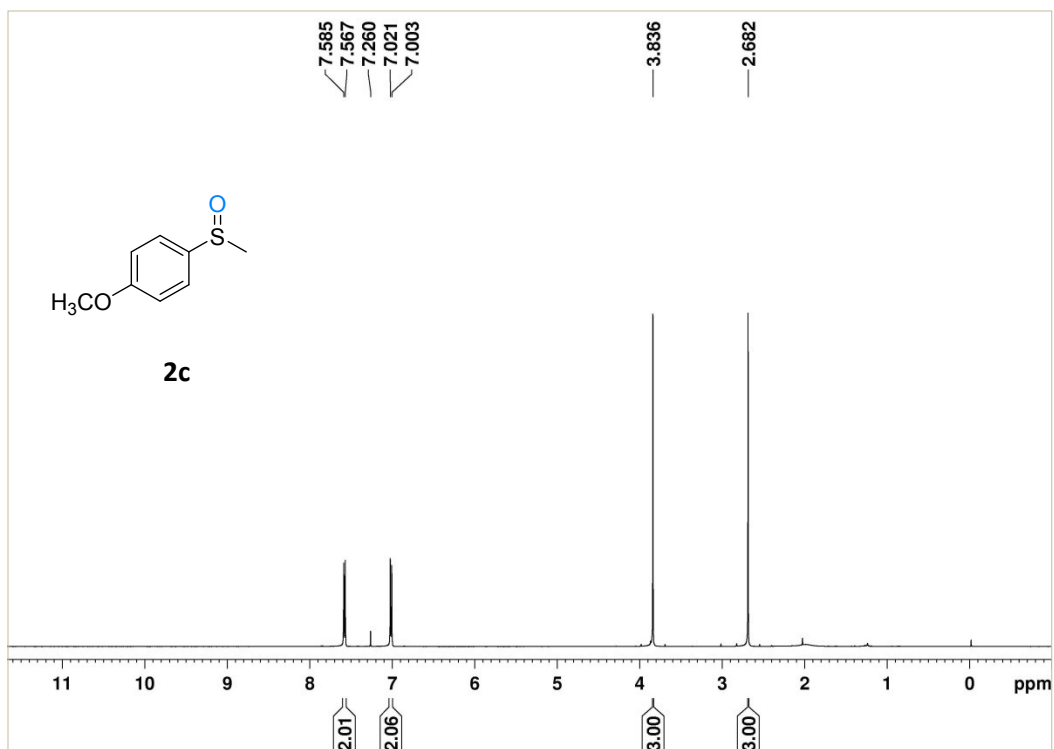

500 MHz  $^1\text{H}$  NMR spectrum of **2c** in  $\text{CDCl}_3$

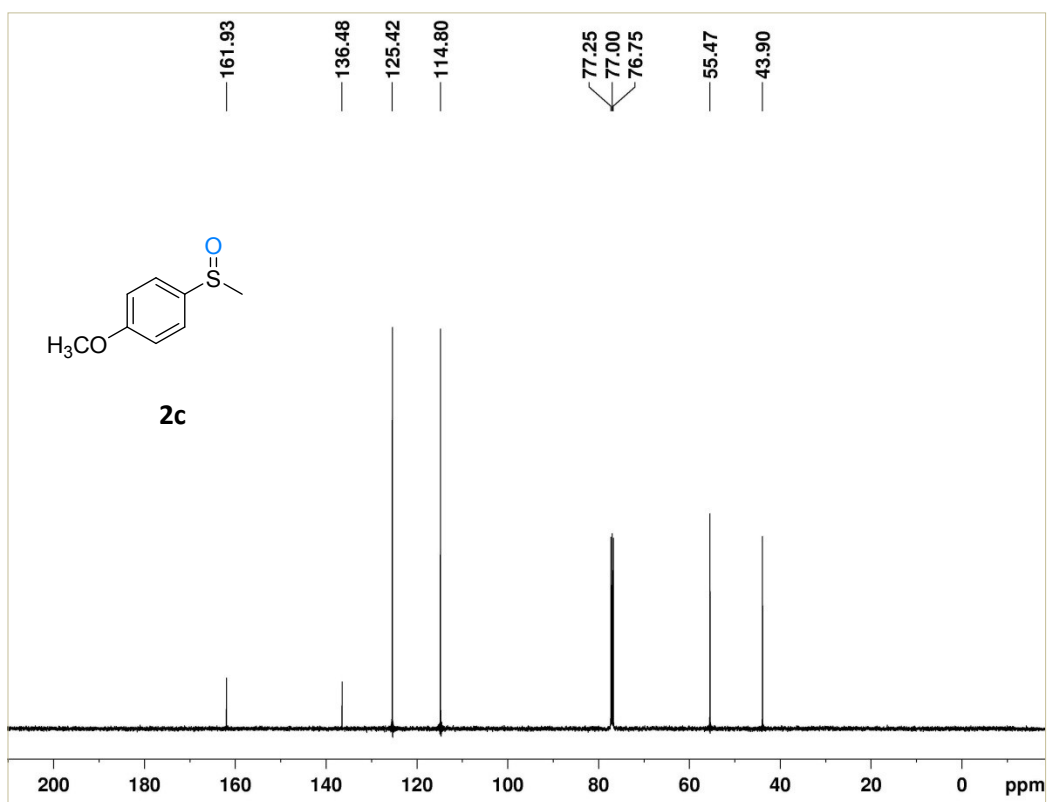

125 MHz  $^{13}\text{C}$ -NMR spectrum of **2c** in  $\text{CDCl}_3$

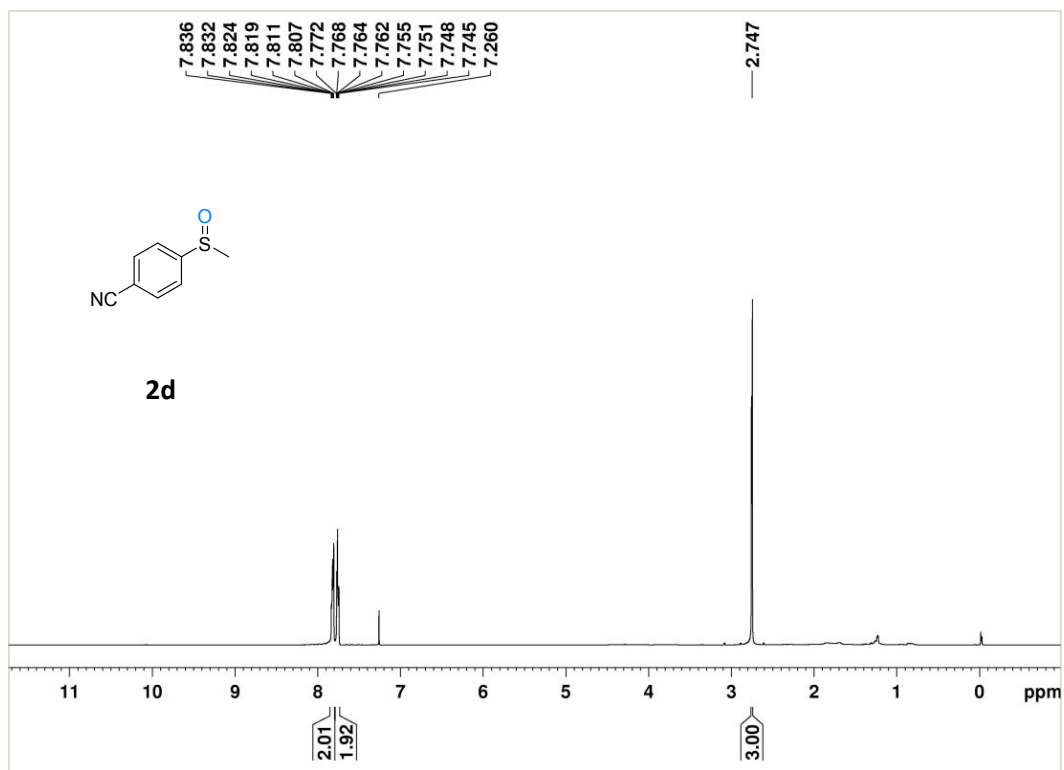

500 MHz  $^1\text{H}$  NMR spectrum of **2d** in  $\text{CDCl}_3$

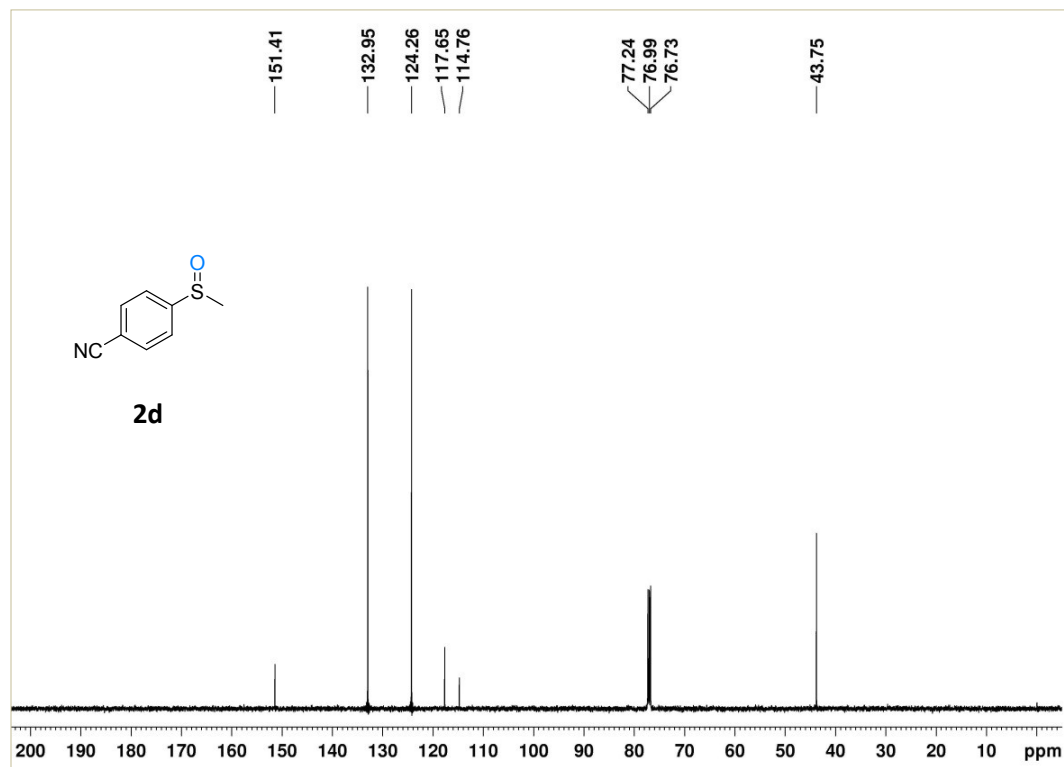

125 MHz  $^{13}\text{C}$ -NMR spectrum of **2d** in  $\text{CDCl}_3$

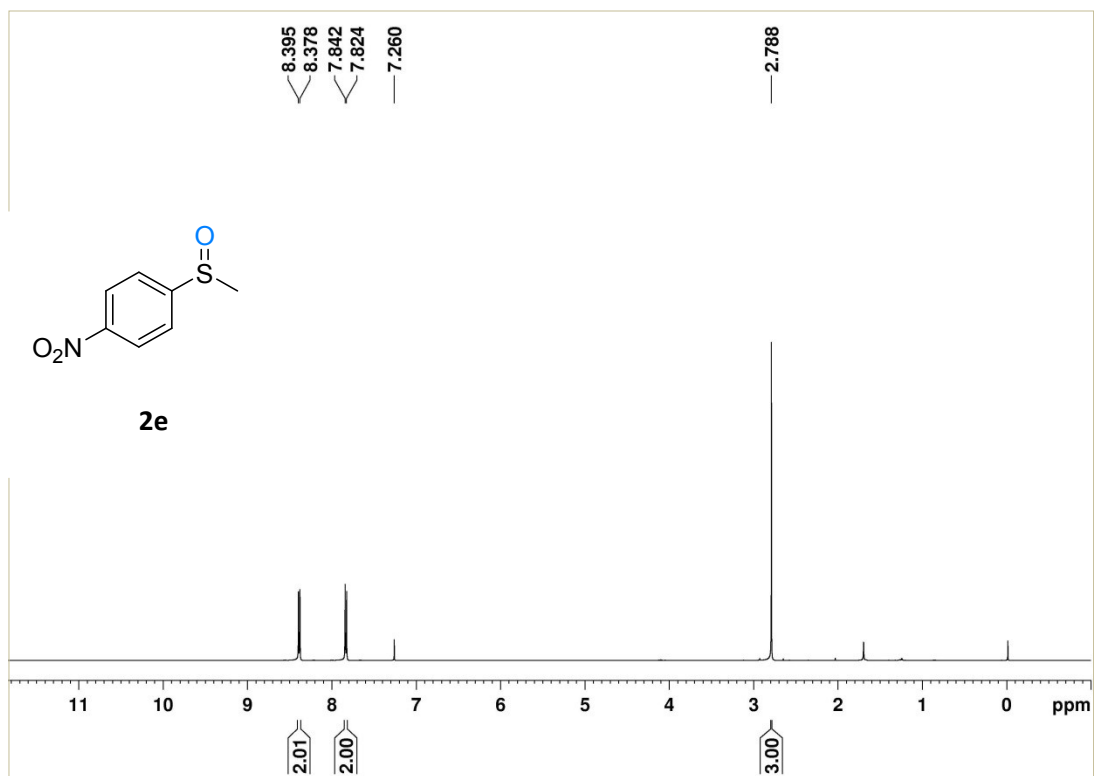

500 MHz  $^1\text{H}$  NMR spectrum of **2e** in  $\text{CDCl}_3$

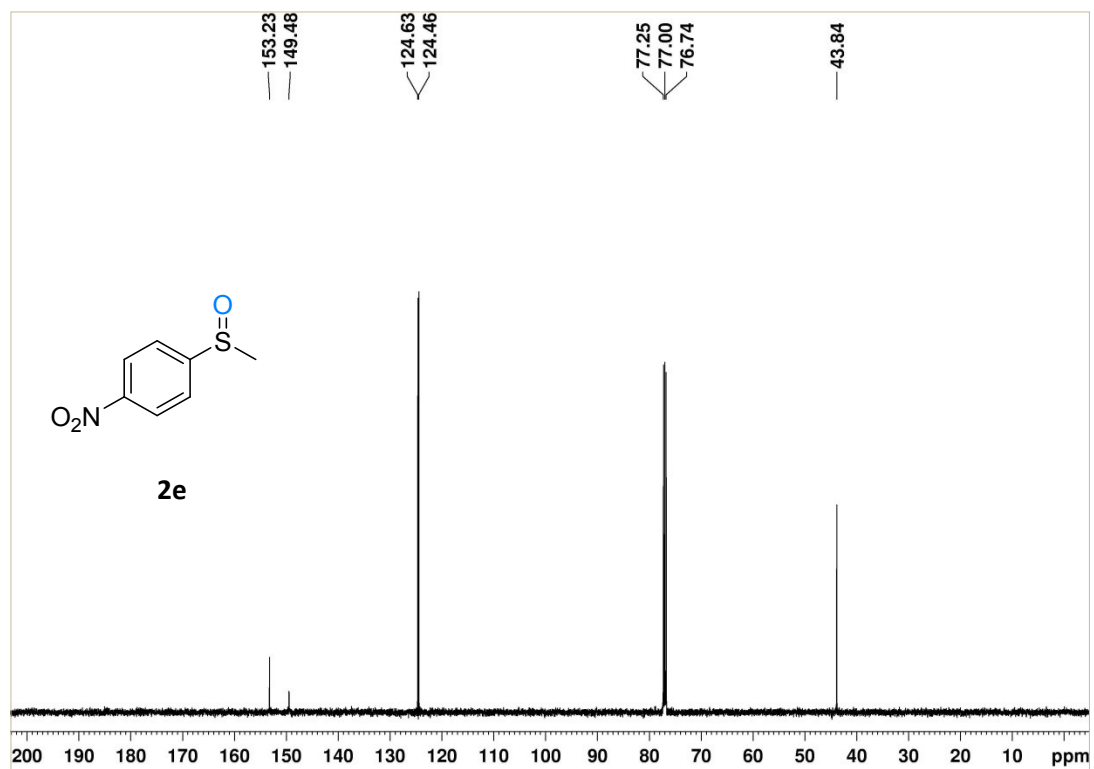

125 MHz  $^{13}\text{C}$ -NMR spectrum of **2e** in  $\text{CDCl}_3$

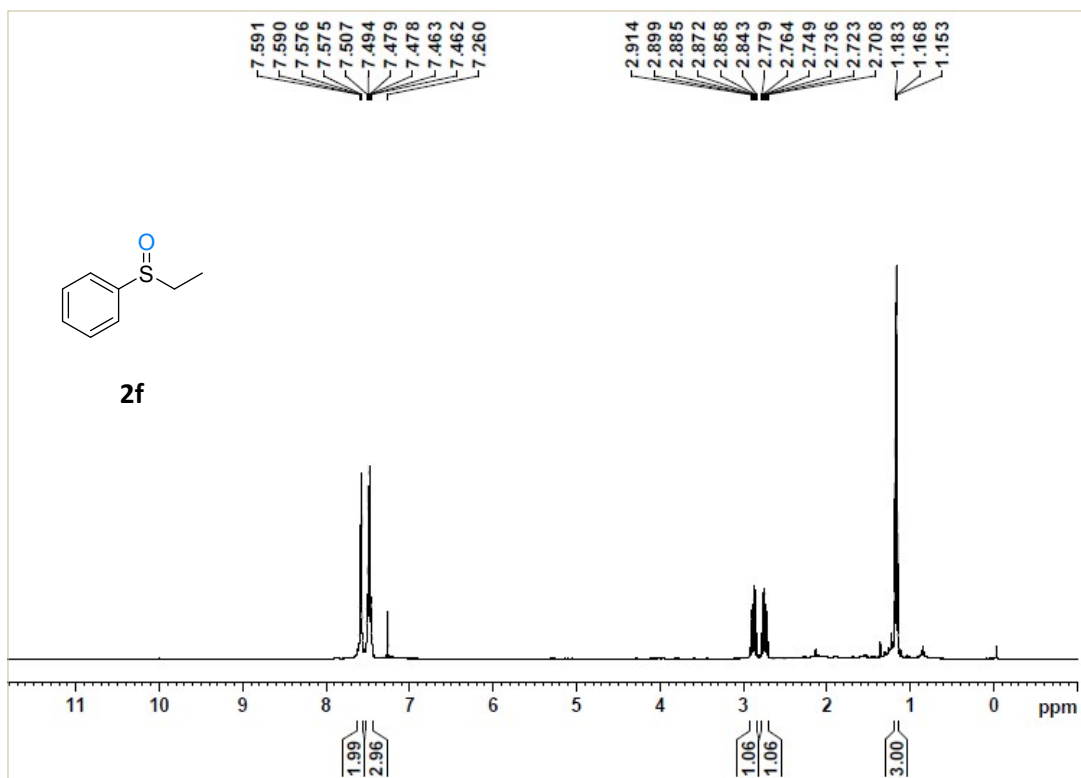

500 MHz  $^1\text{H}$  NMR spectrum of **2f** in  $\text{CDCl}_3$

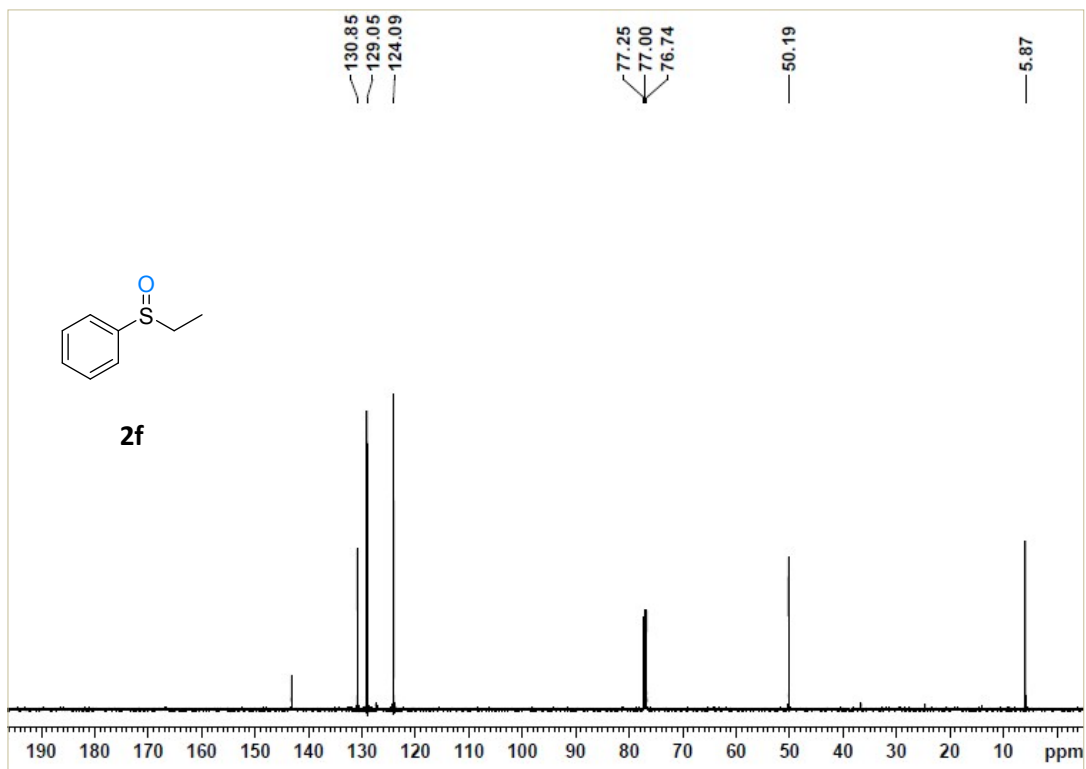

125 MHz  $^{13}\text{C}$ -NMR spectrum of **2f** in  $\text{CDCl}_3$

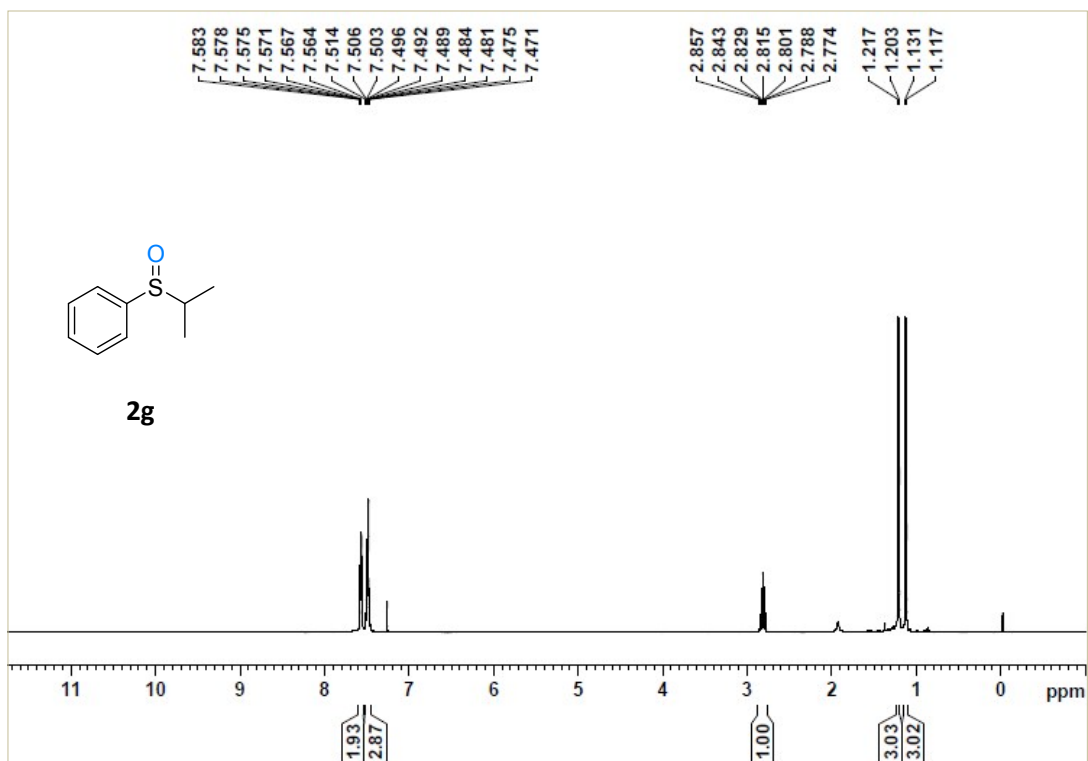

500 MHz  $^1\text{H}$  NMR spectrum of **2g** in  $\text{CDCl}_3$

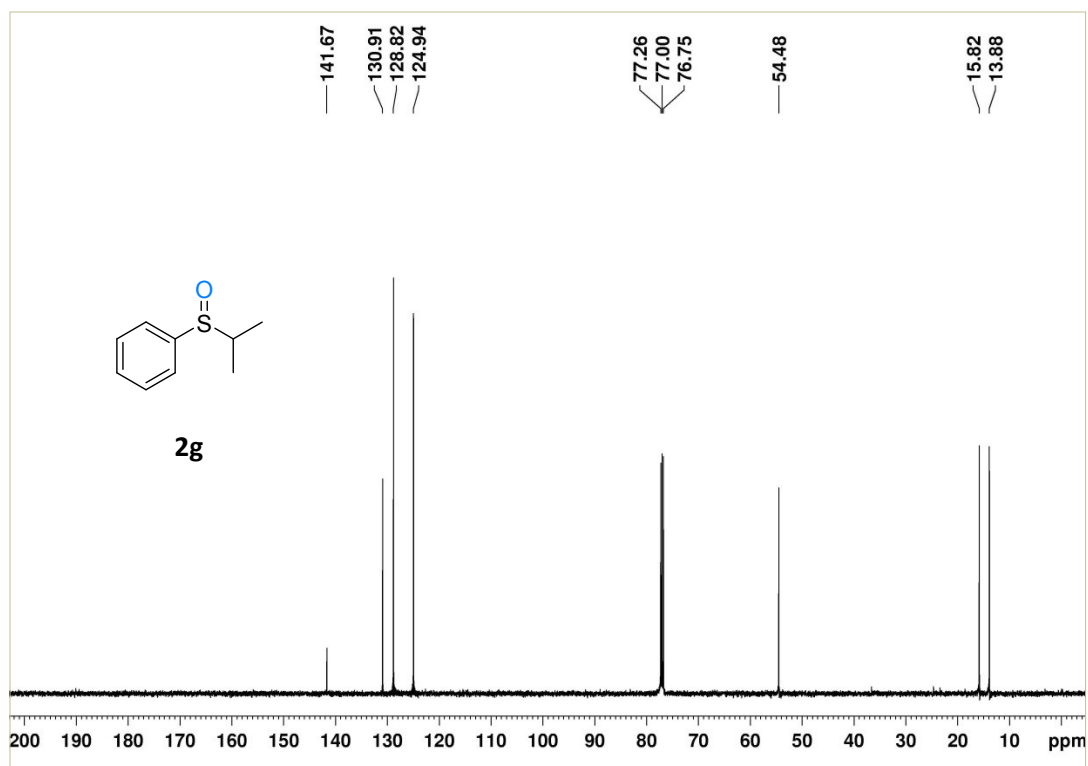

125 MHz  $^{13}\text{C}$ -NMR spectrum of **2g** in  $\text{CDCl}_3$



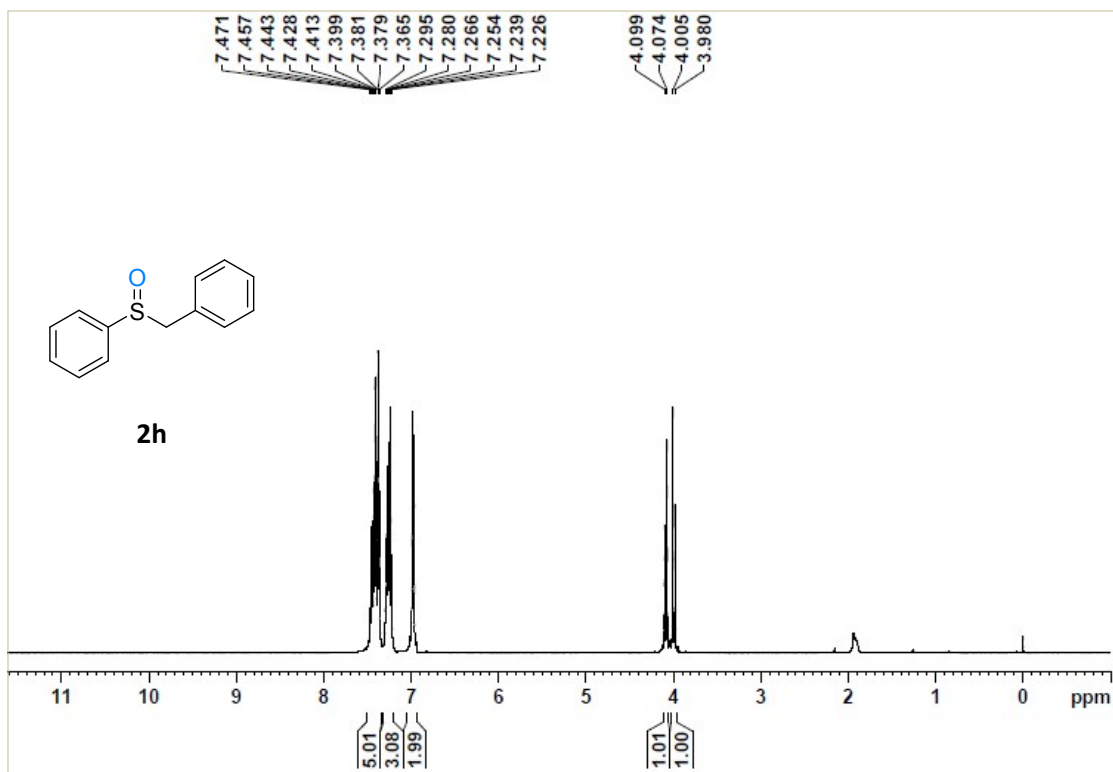

500 MHz  $^1\text{H}$  NMR spectrum of **2h** in  $\text{CDCl}_3$

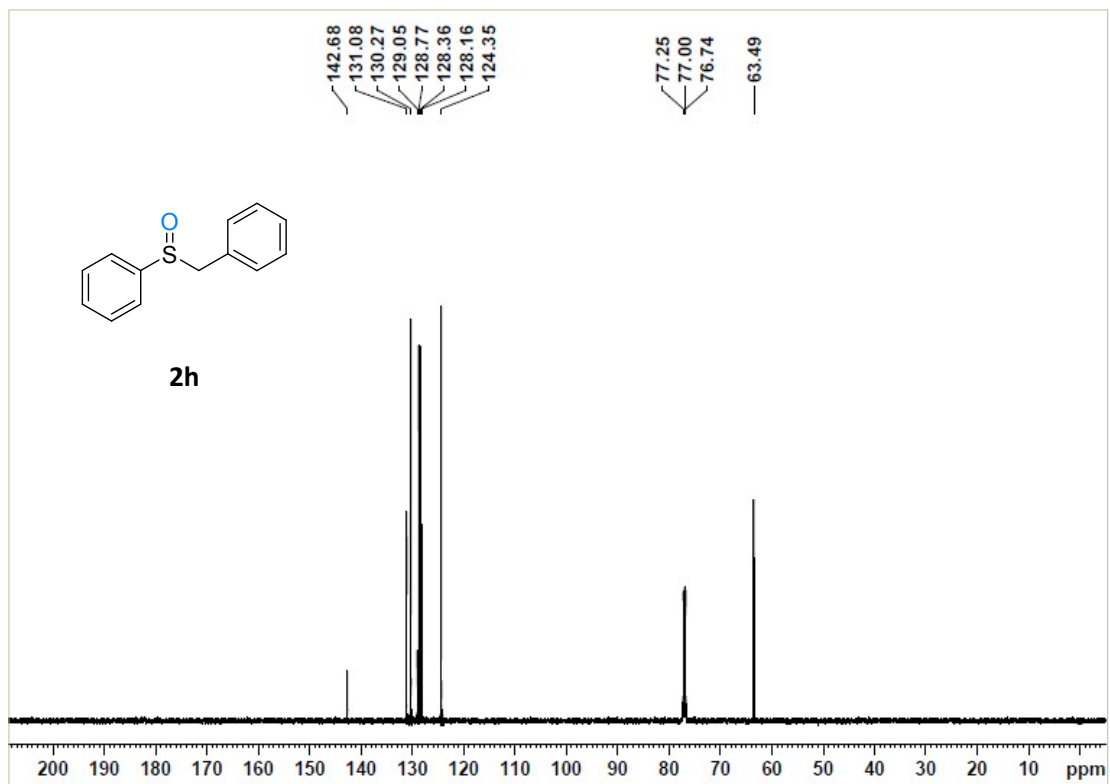

125 MHz  $^{13}\text{C}$ -NMR spectrum of **2h** in  $\text{CDCl}_3$

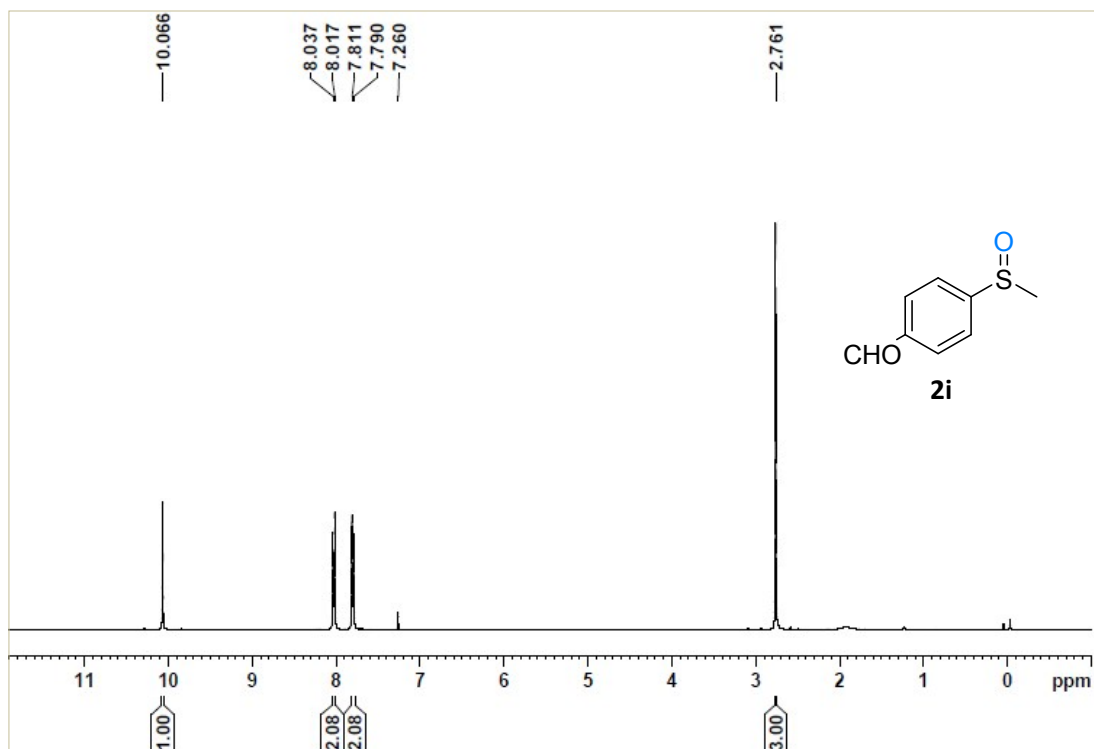

400 MHz  $^1\text{H}$  NMR spectrum of **2i** in  $\text{CDCl}_3$

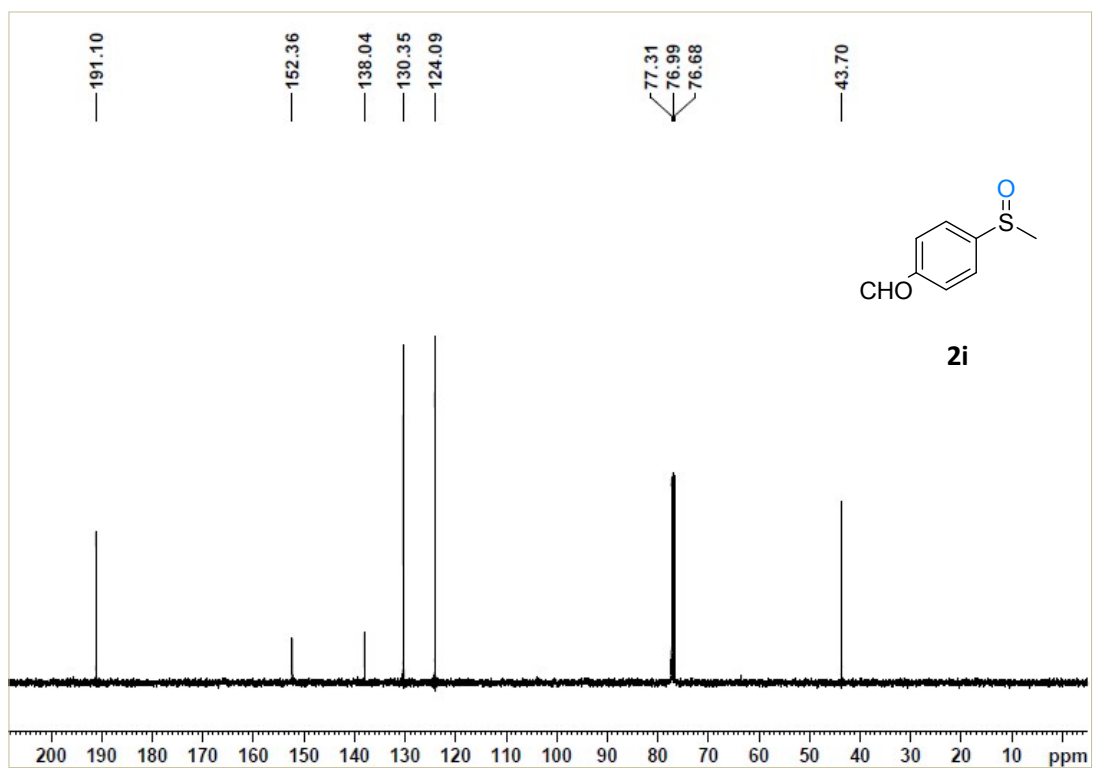

100 MHz  $^{13}\text{C}$ -NMR spectrum of **2i** in  $\text{CDCl}_3$

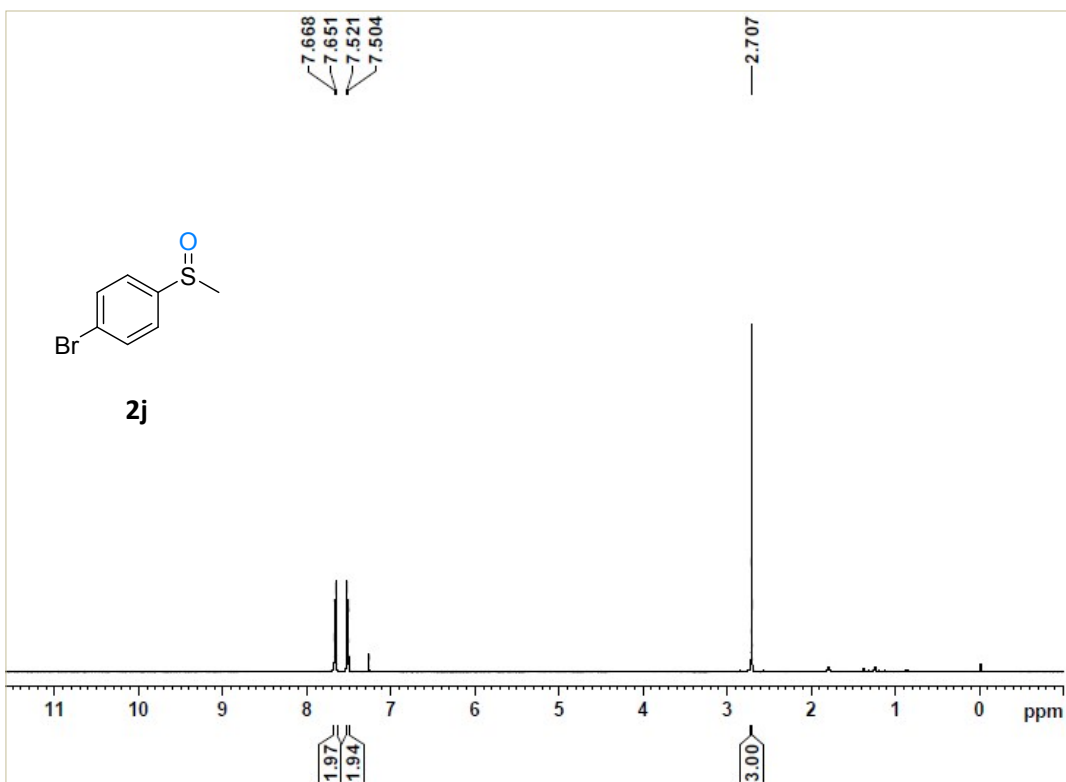

500 MHz  $^1\text{H}$  NMR spectrum of **2j** in  $\text{CDCl}_3$

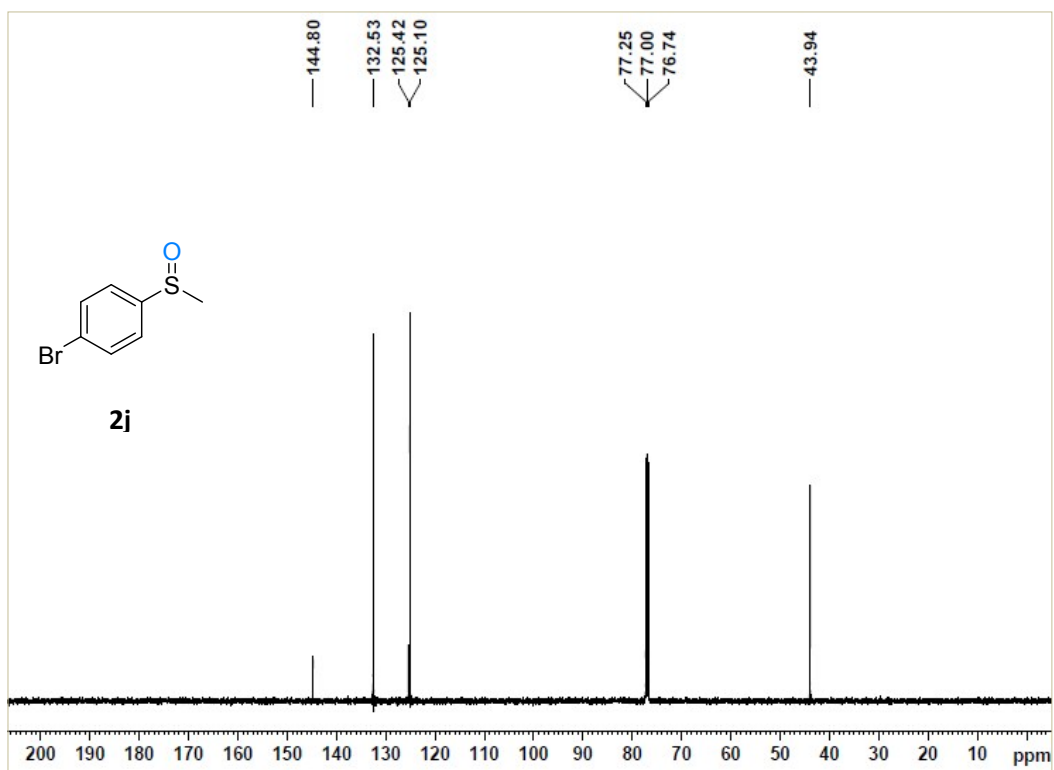

125 MHz  $^{13}\text{C}$ -NMR spectrum of **2j** in  $\text{CDCl}_3$

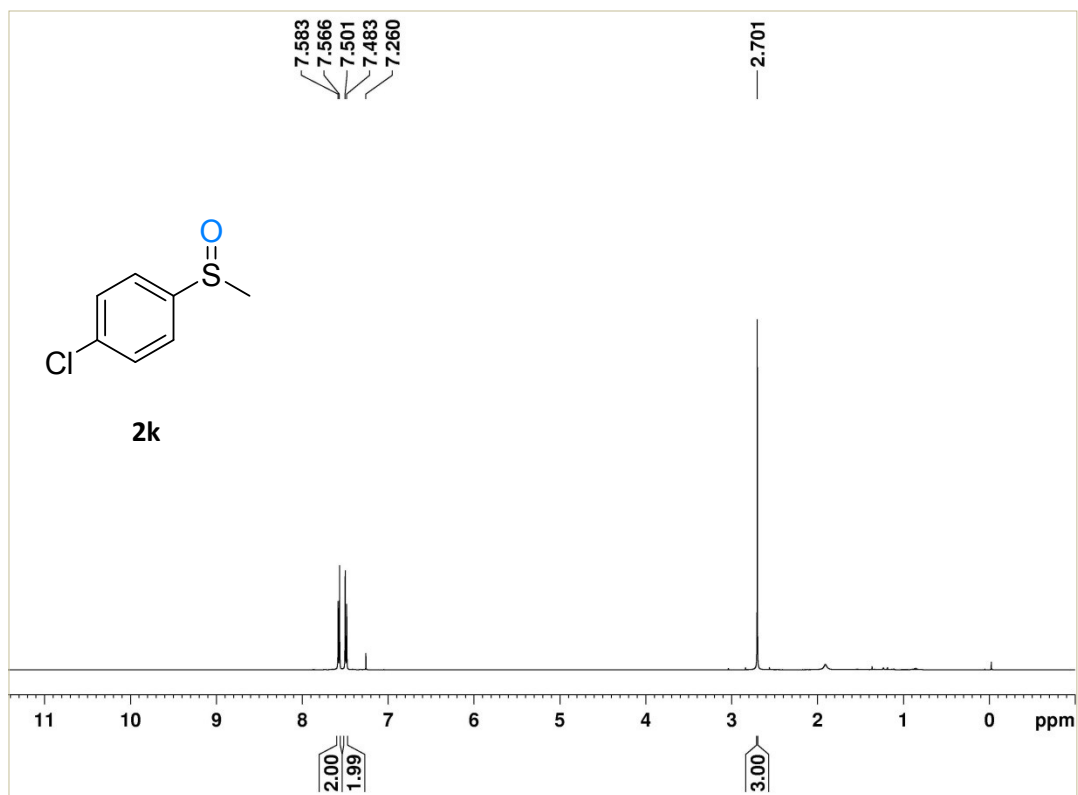

500 MHz  $^1\text{H}$  NMR spectrum of **2k** in  $\text{CDCl}_3$

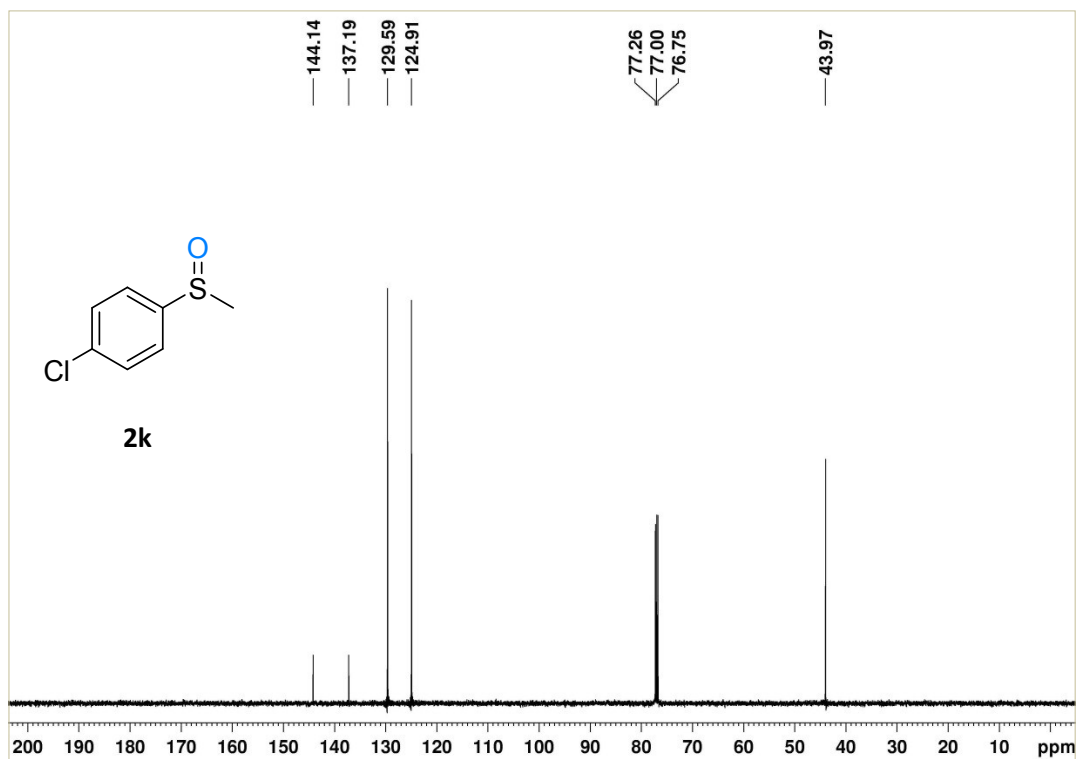

125 MHz  $^{13}\text{C}$ -NMR spectrum of **2k** in  $\text{CDCl}_3$

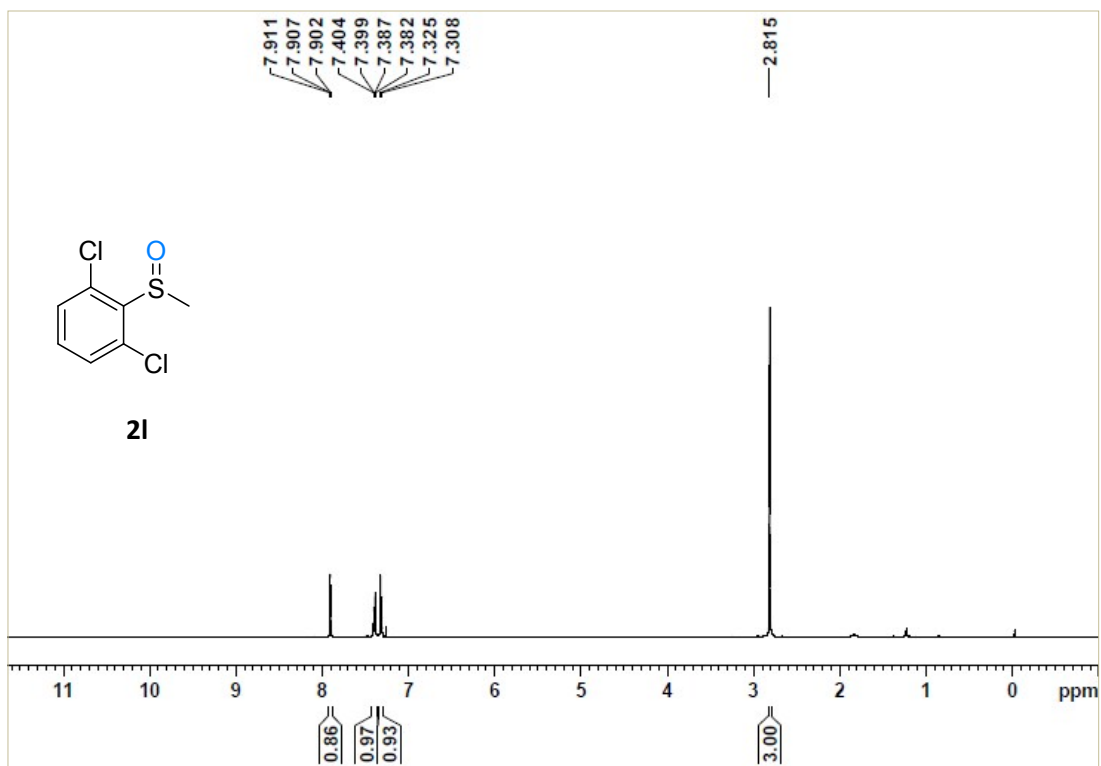

500 MHz  $^1\text{H}$  NMR spectrum of **2I** in  $\text{CDCl}_3$

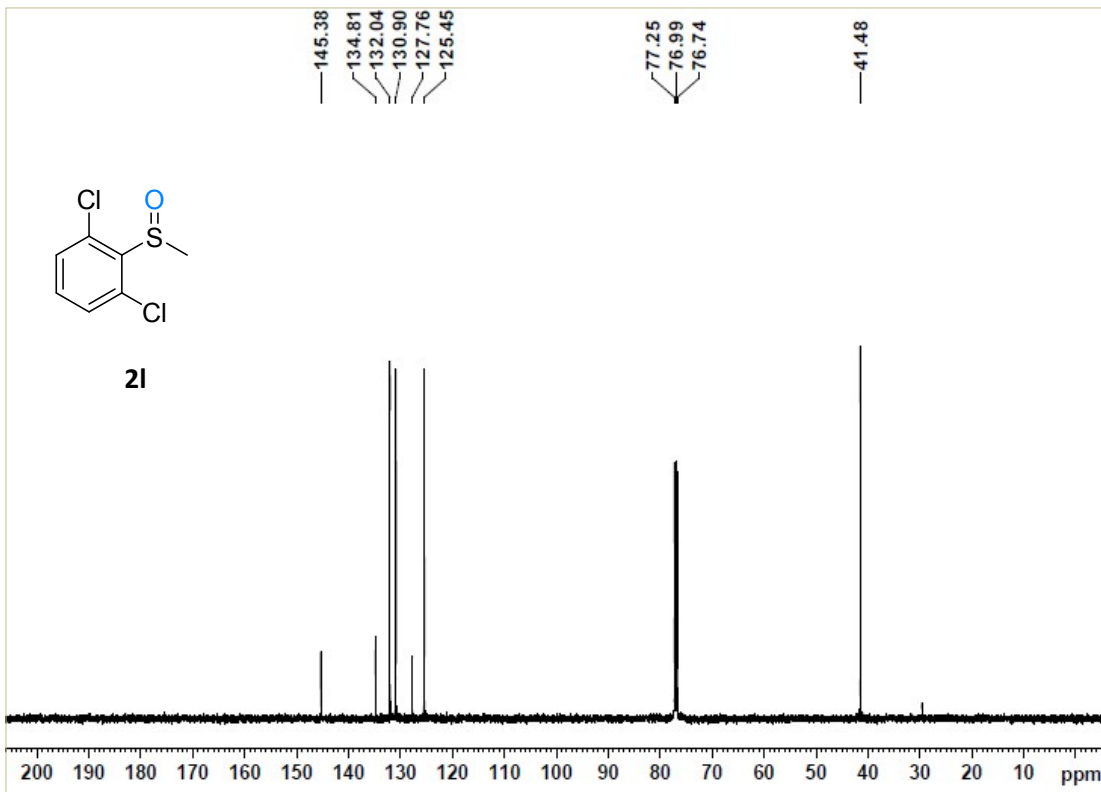

125 MHz  $^{13}\text{C}$ -NMR spectrum of **2I** in  $\text{CDCl}_3$

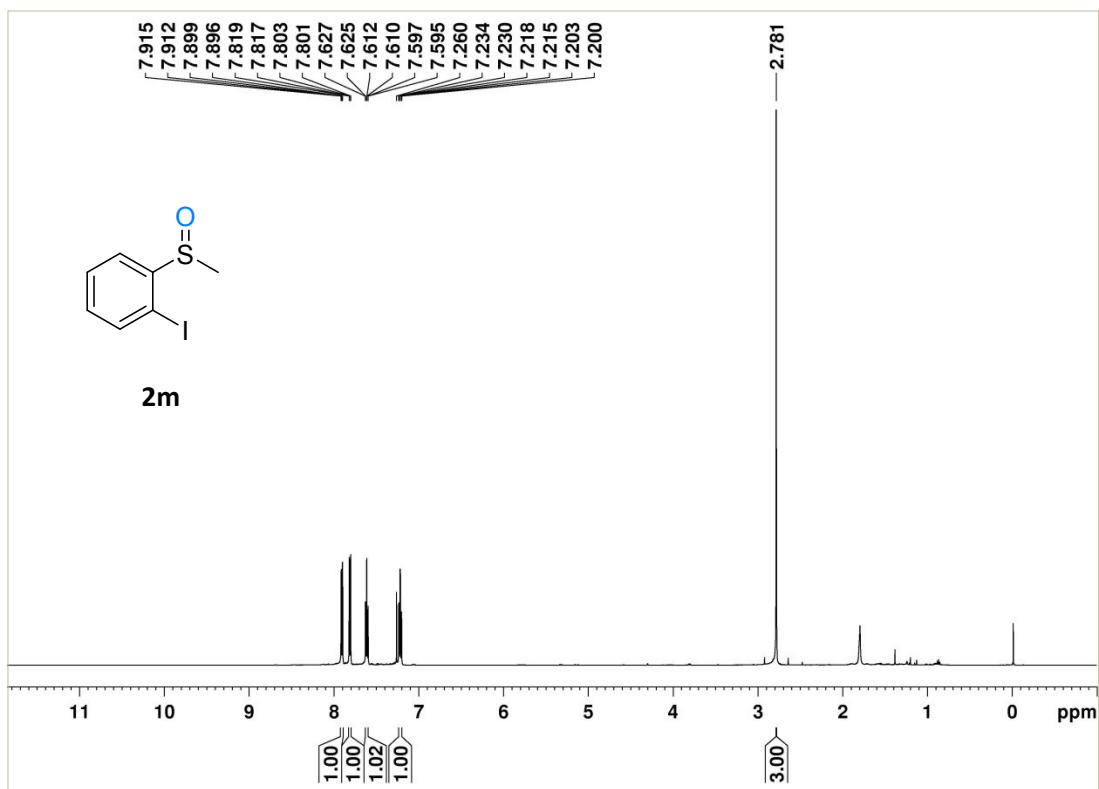

500 MHz  $^1\text{H}$  NMR spectrum of **2m** in  $\text{CDCl}_3$

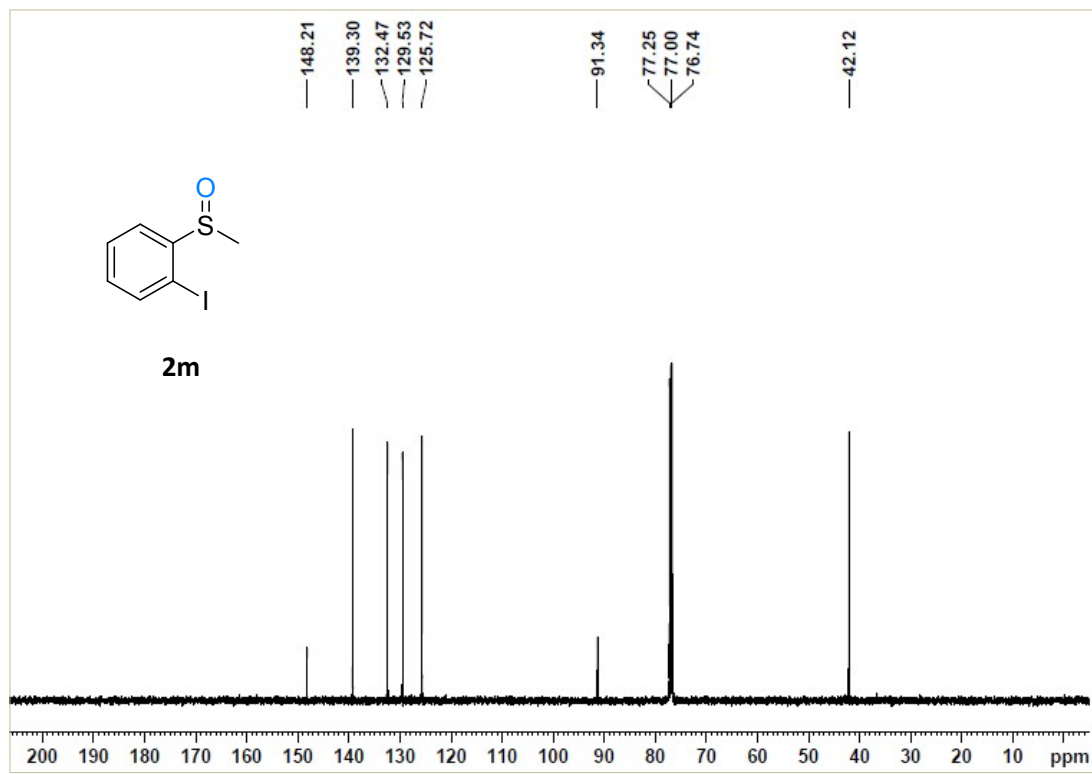

125 MHz  $^{13}\text{C}$ -NMR spectrum of **2m** in  $\text{CDCl}_3$

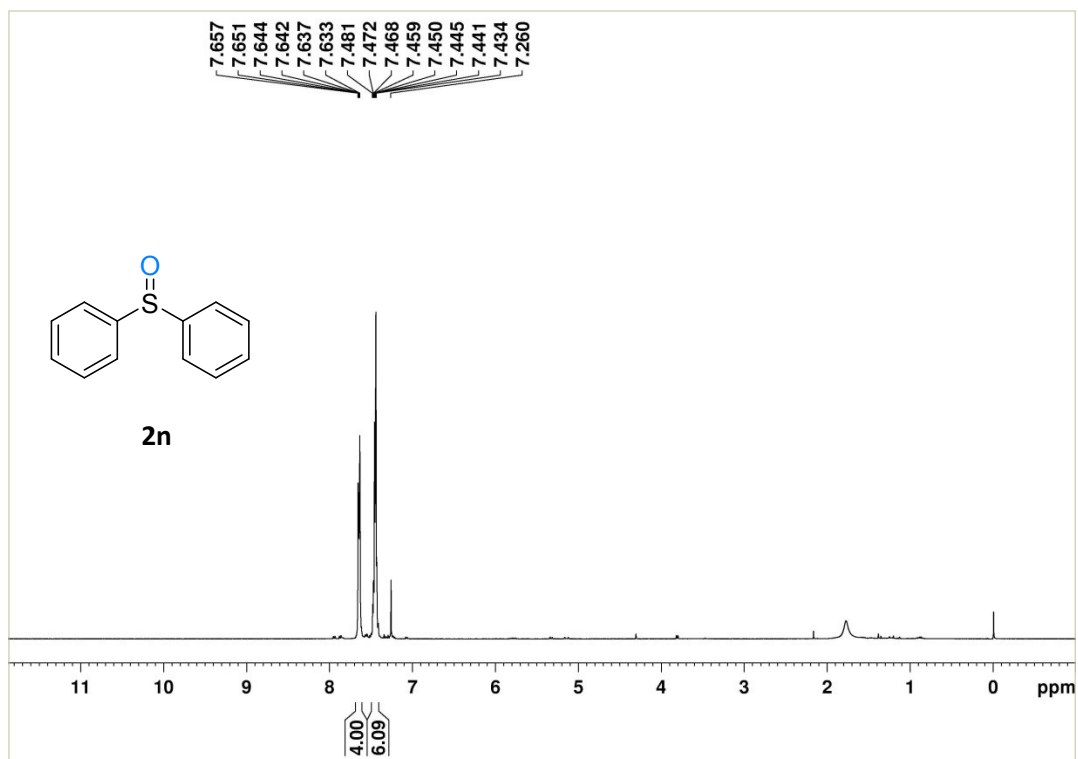

400 MHz  $^1\text{H}$  NMR spectrum of **2n** in  $\text{CDCl}_3$

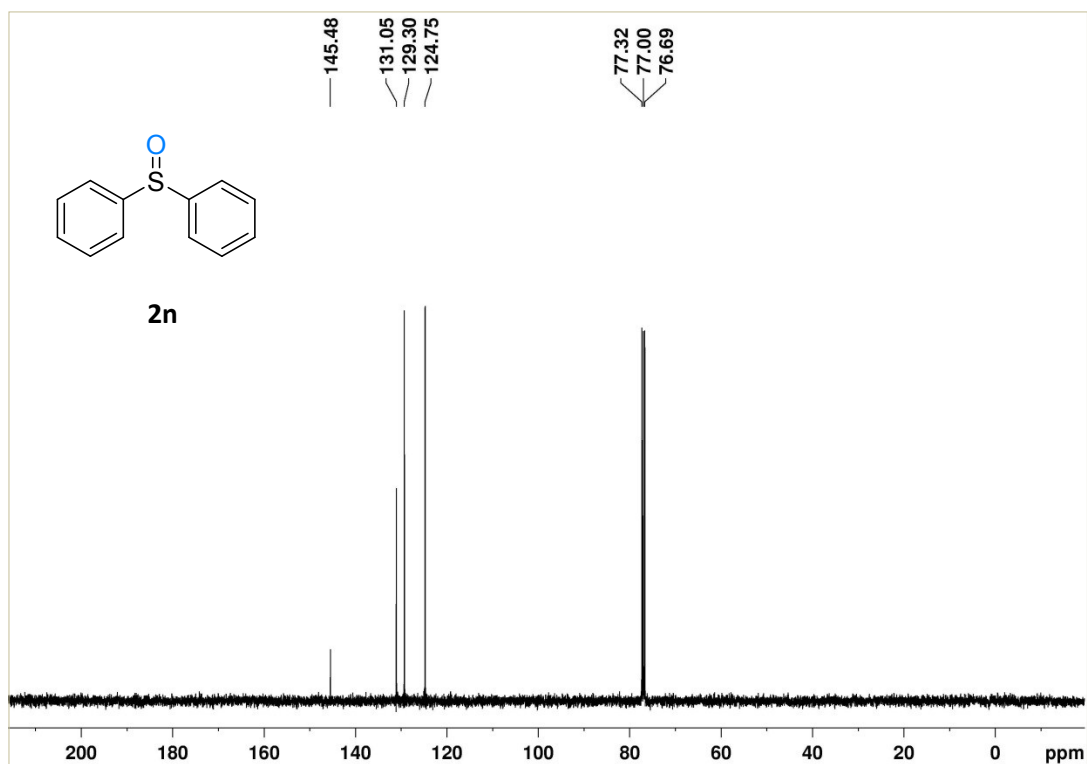

100 MHz  $^{13}\text{C}$ -NMR spectrum of **2n** in  $\text{CDCl}_3$

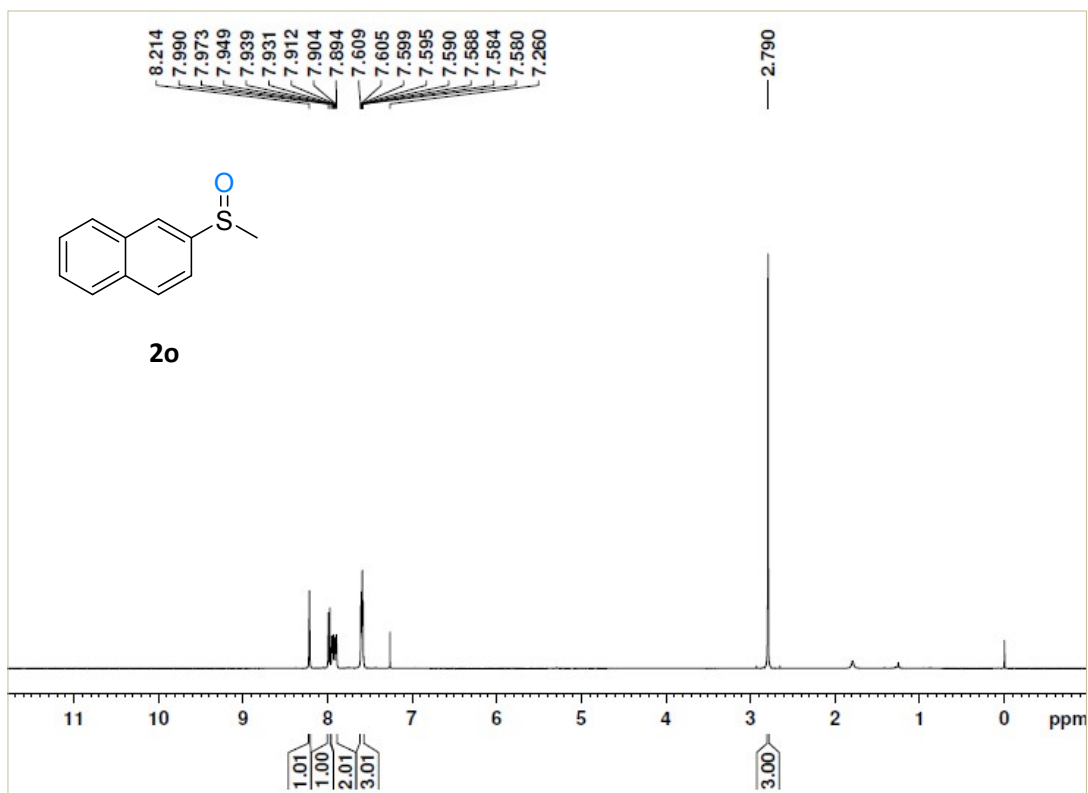

500 MHz  $^1\text{H}$  NMR spectrum of **2o** in  $\text{CDCl}_3$

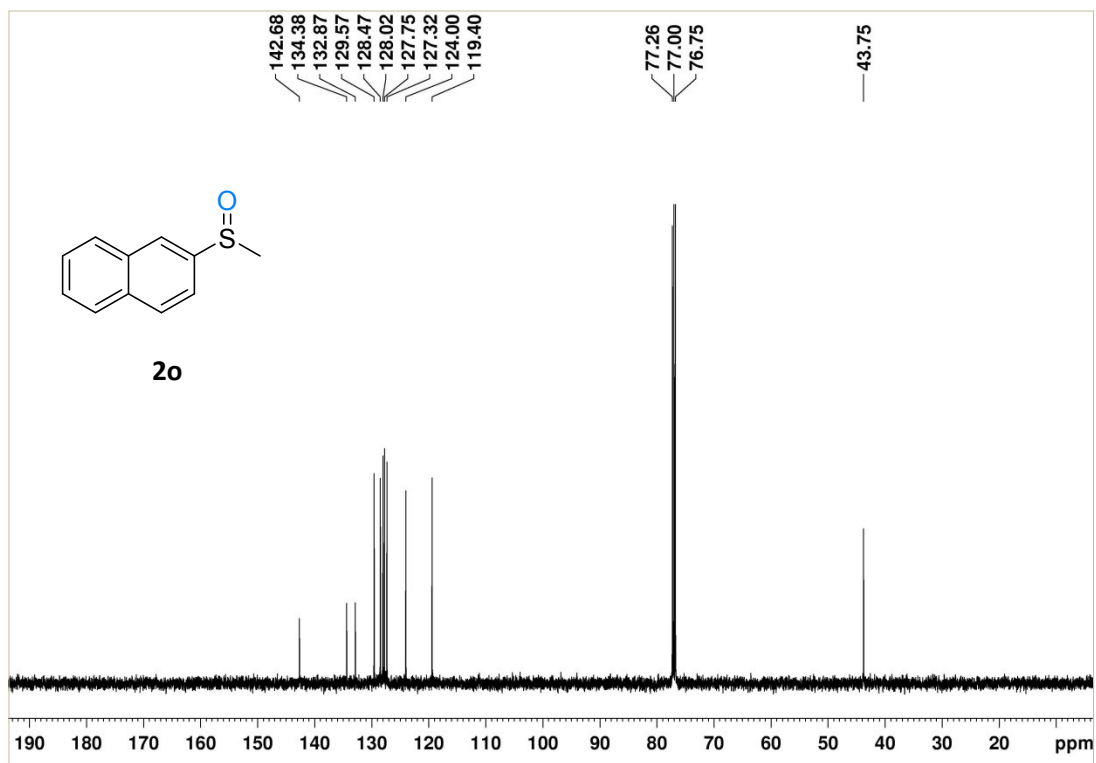

125 MHz  $^{13}\text{C}$ -NMR spectrum of **2o** in  $\text{CDCl}_3$



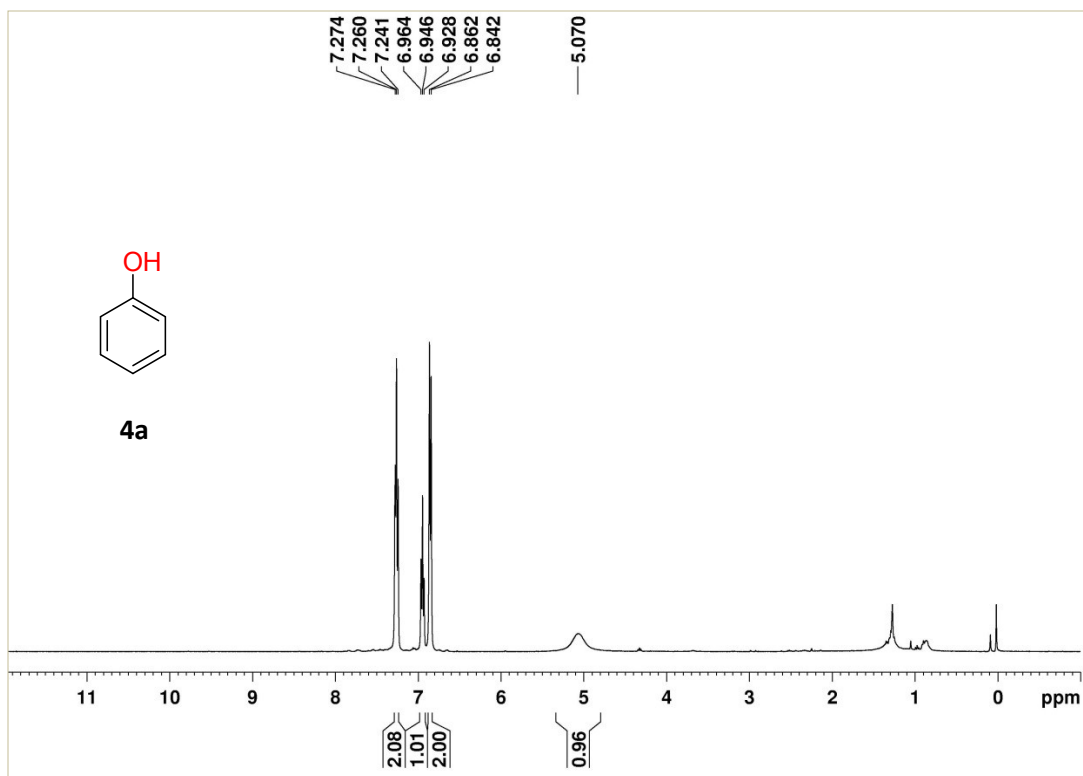

400 MHz  $^1\text{H}$  NMR spectrum of **4a** in  $\text{CDCl}_3$

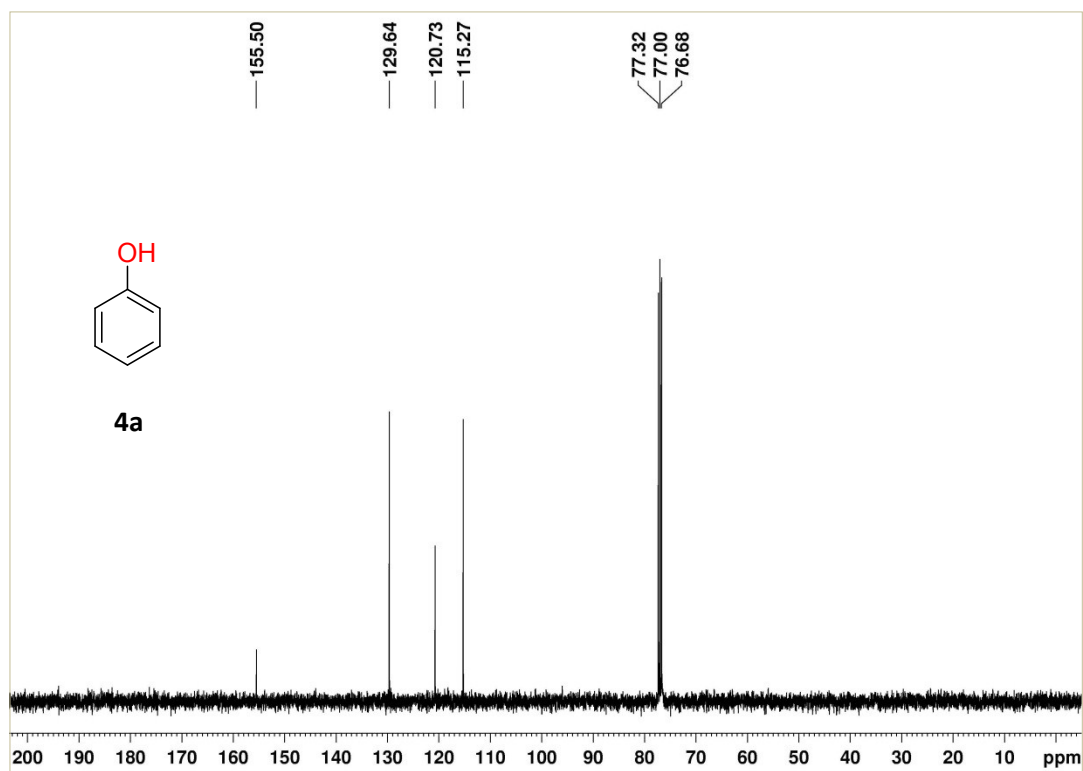

100 MHz  $^{13}\text{C}$ -NMR spectrum of **4a** in  $\text{CDCl}_3$

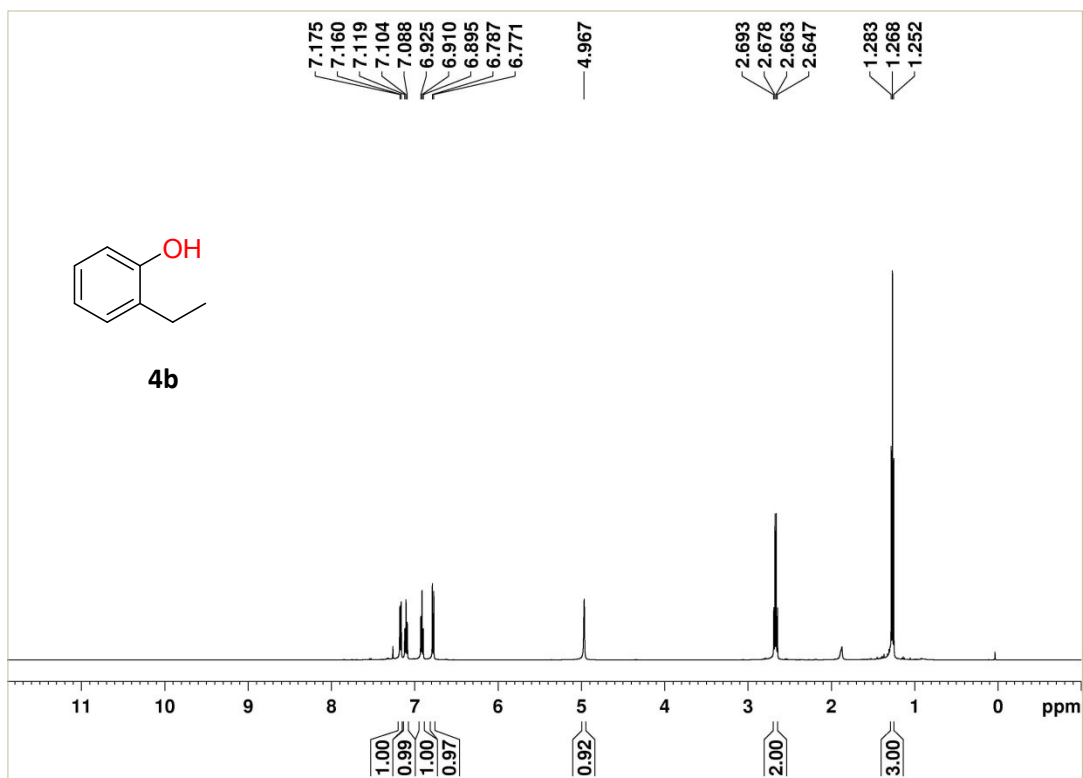

500 MHz  $^1\text{H}$  NMR spectrum of **4b** in  $\text{CDCl}_3$

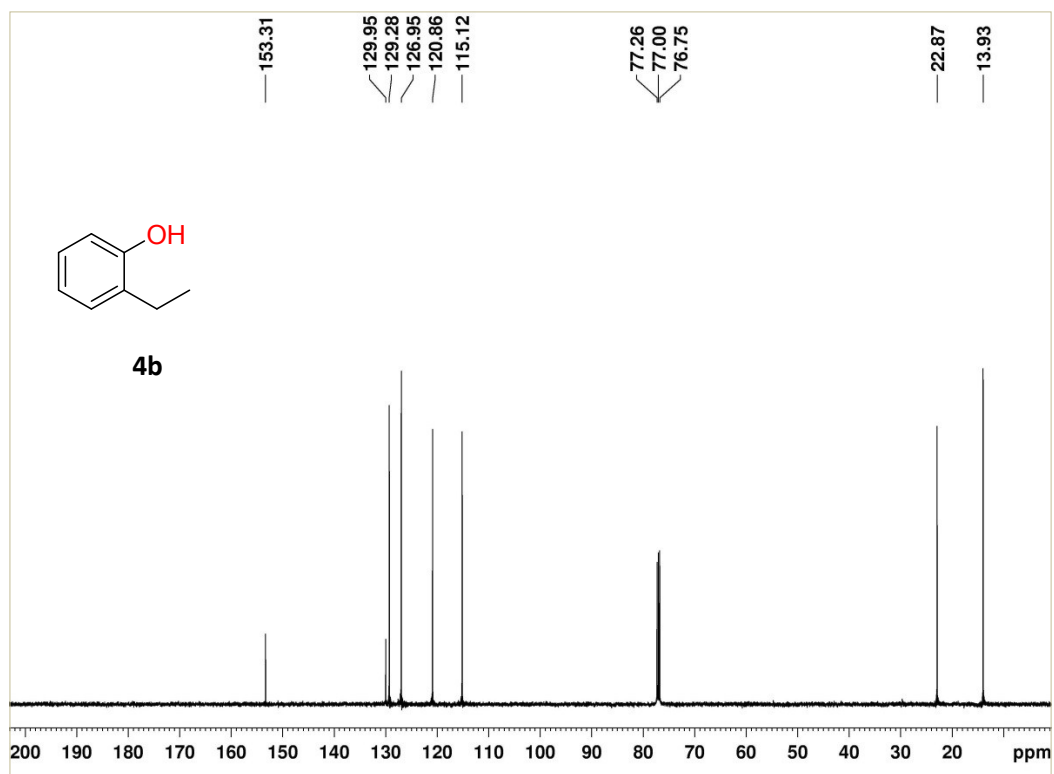

125 MHz  $^{13}\text{C}$ -NMR spectrum of **4b** in  $\text{CDCl}_3$

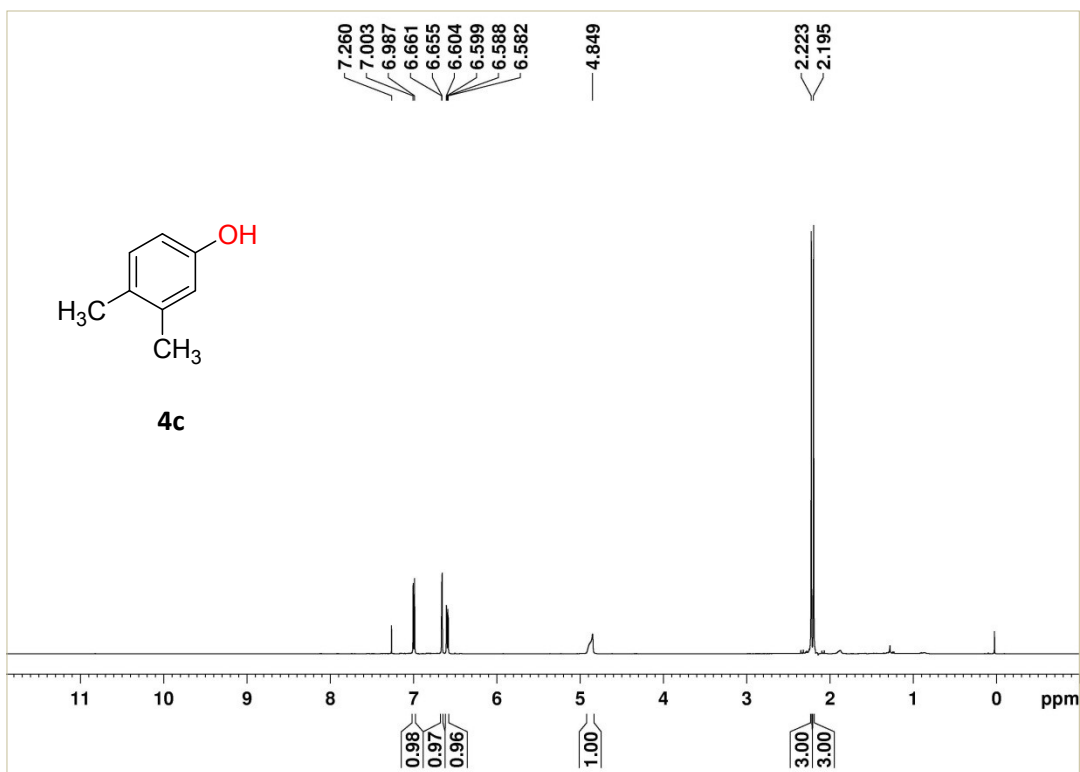

500 MHz  $^1\text{H}$  NMR spectrum of **4c** in  $\text{CDCl}_3$

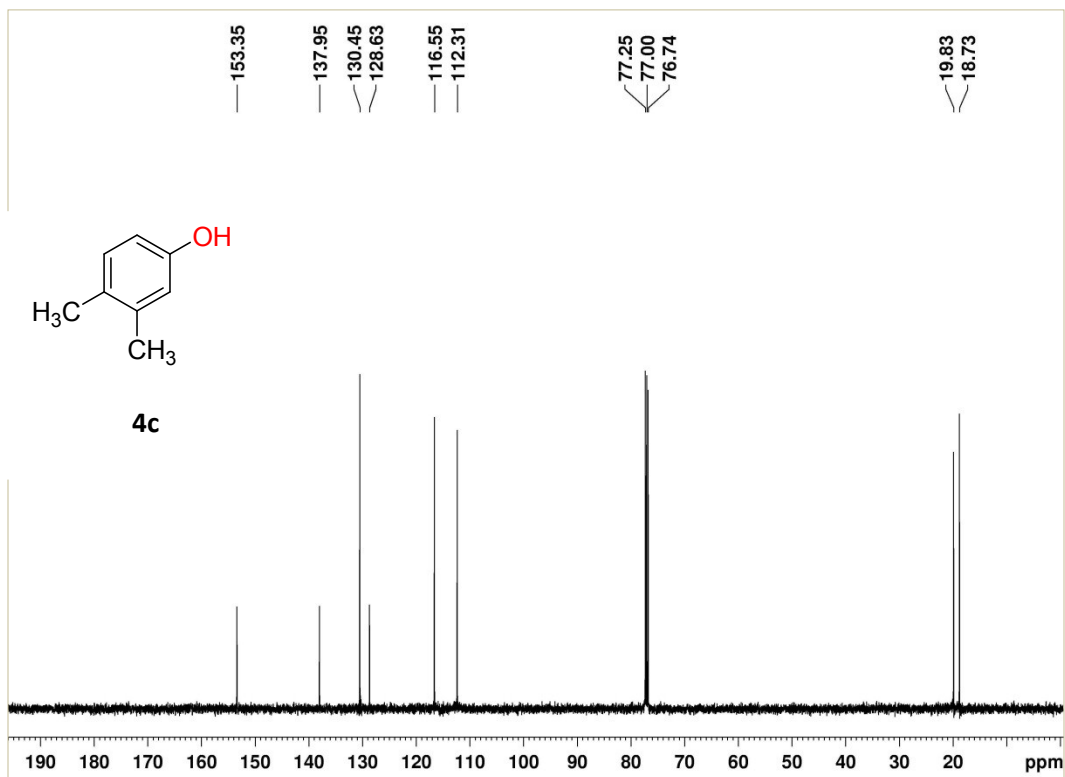

125 MHz  $^{13}\text{C}$ -NMR spectrum of **4c** in  $\text{CDCl}_3$

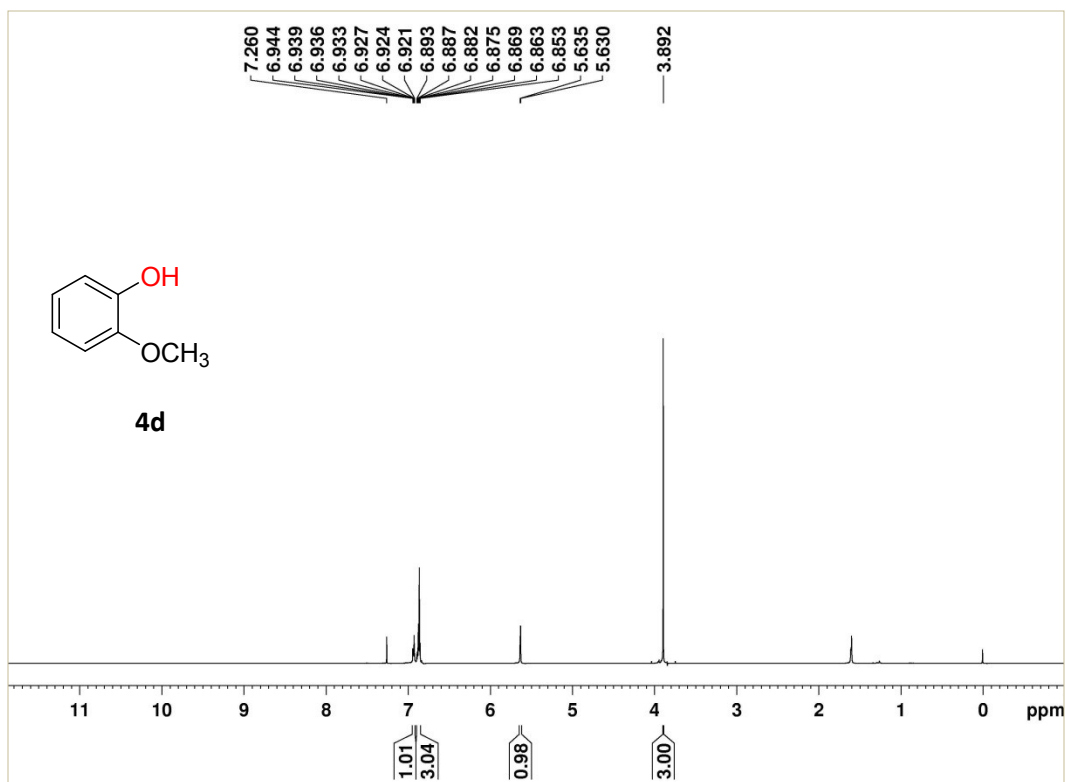

500 MHz  $^1\text{H}$  NMR spectrum of **4d** in  $\text{CDCl}_3$

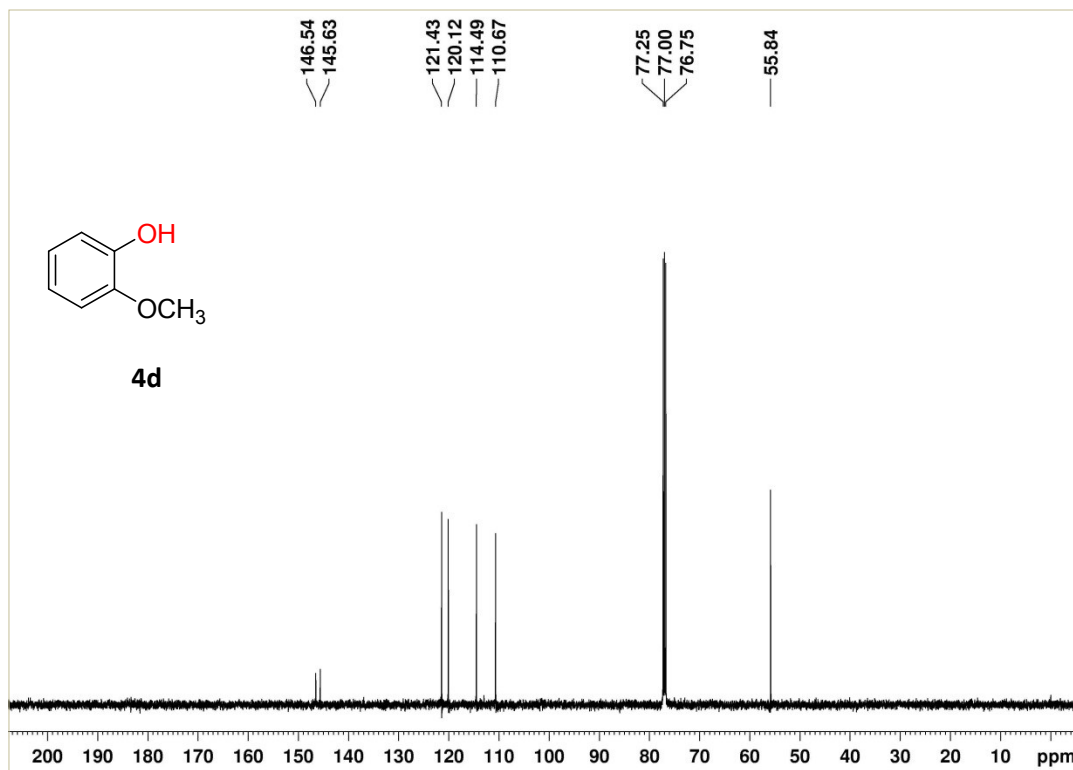

125 MHz  $^{13}\text{C}$ -NMR spectrum of **4d** in  $\text{CDCl}_3$

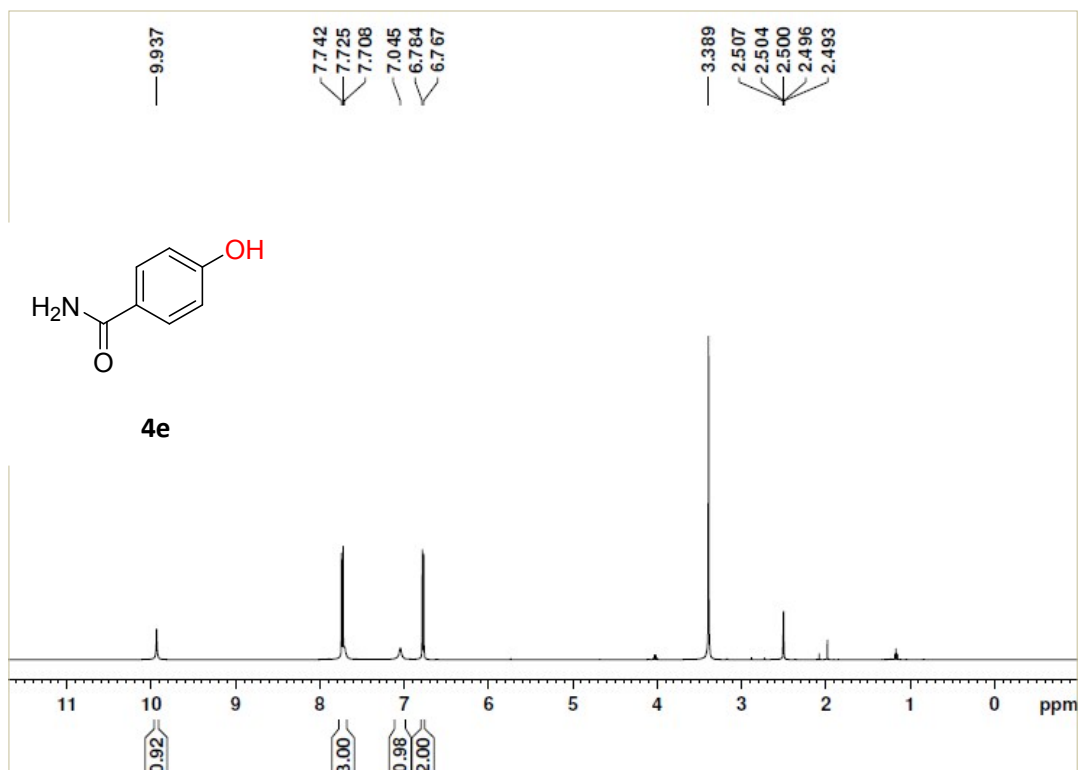

500 MHz  $^1\text{H}$  NMR spectrum of **4e** in DMSO -  $\text{d}_6$

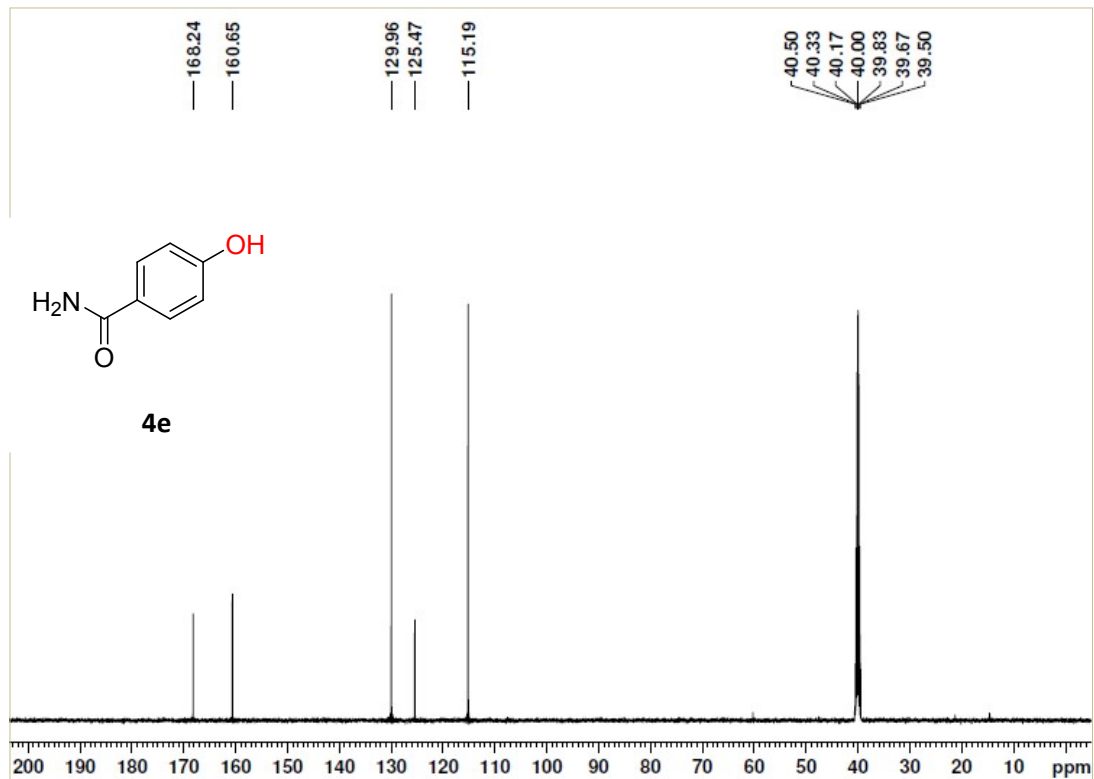

125 MHz  $^{13}\text{C}$ -NMR spectrum of **4e** in DMSO -  $\text{d}_6$

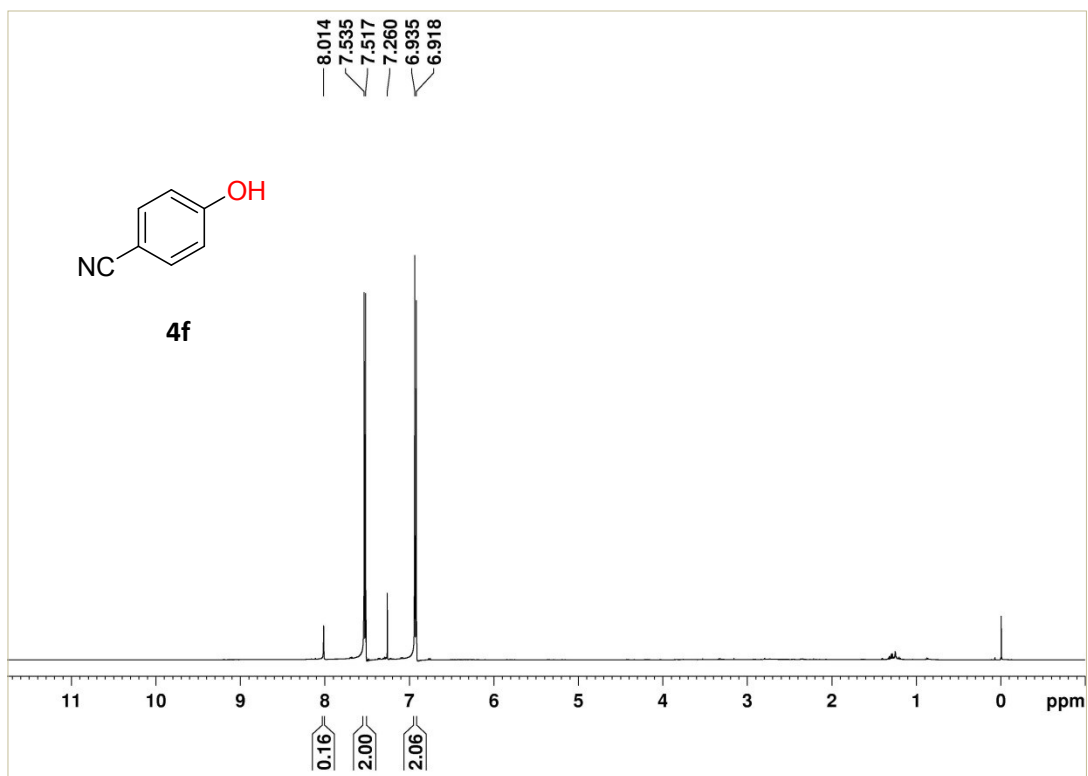

500 MHz  $^1\text{H}$  NMR spectrum of **4f** in  $\text{CDCl}_3$

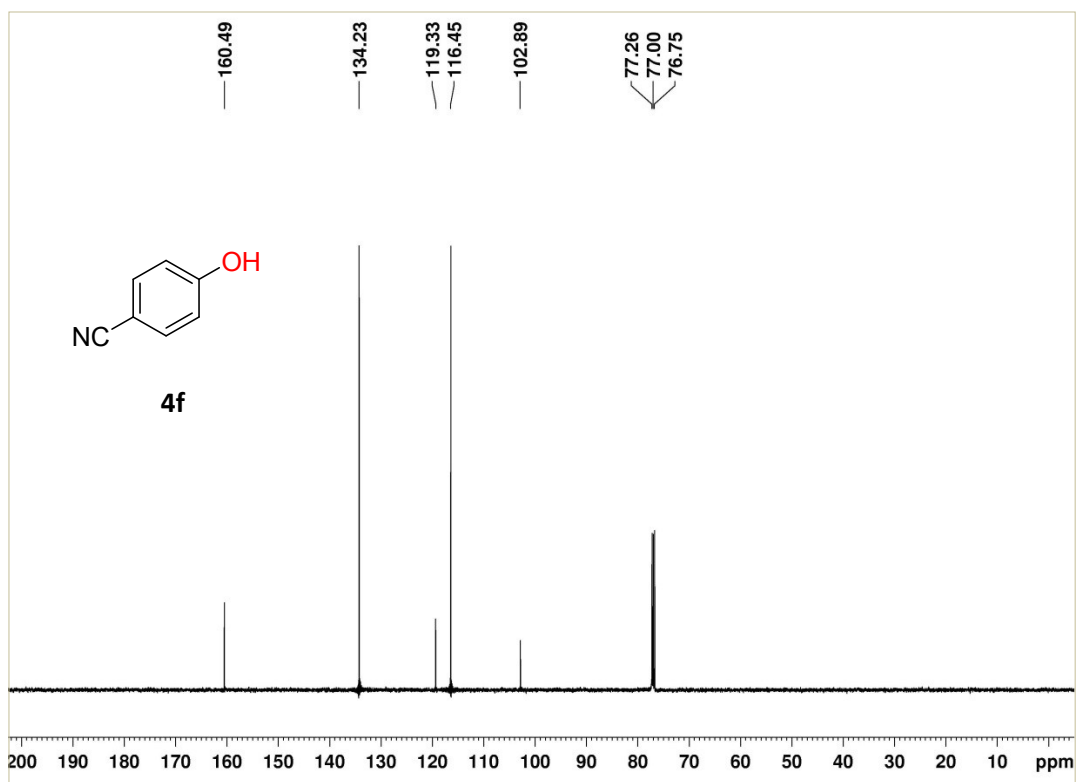

125 MHz  $^{13}\text{C}$ -NMR spectrum of **4f** in  $\text{CDCl}_3$

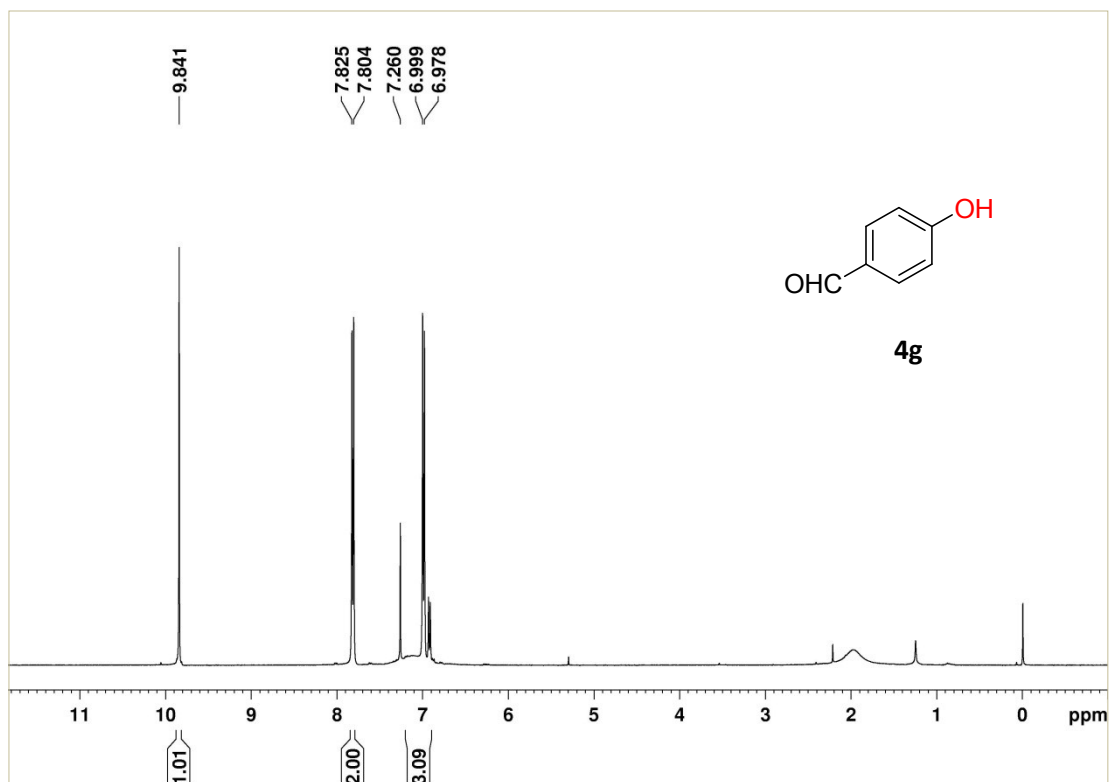

400 MHz  $^1\text{H}$  NMR spectrum of **4g** in  $\text{CDCl}_3$

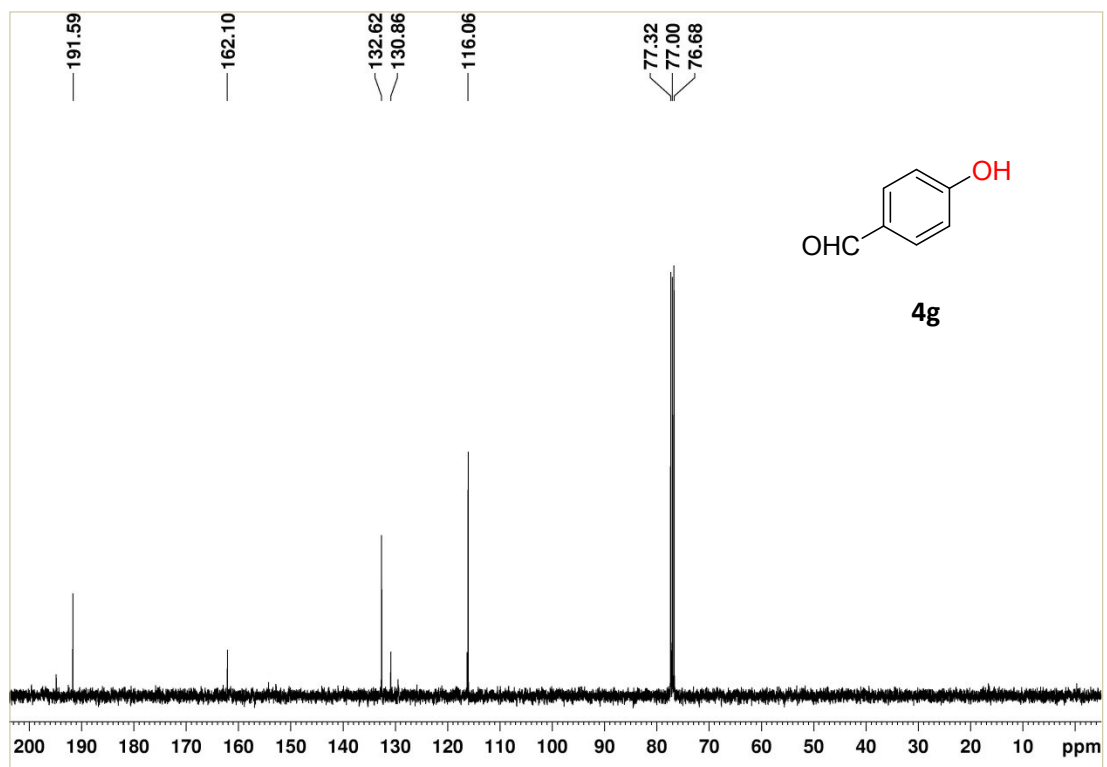

100 MHz  $^{13}\text{C}$ -NMR spectrum of **4g** in  $\text{CDCl}_3$

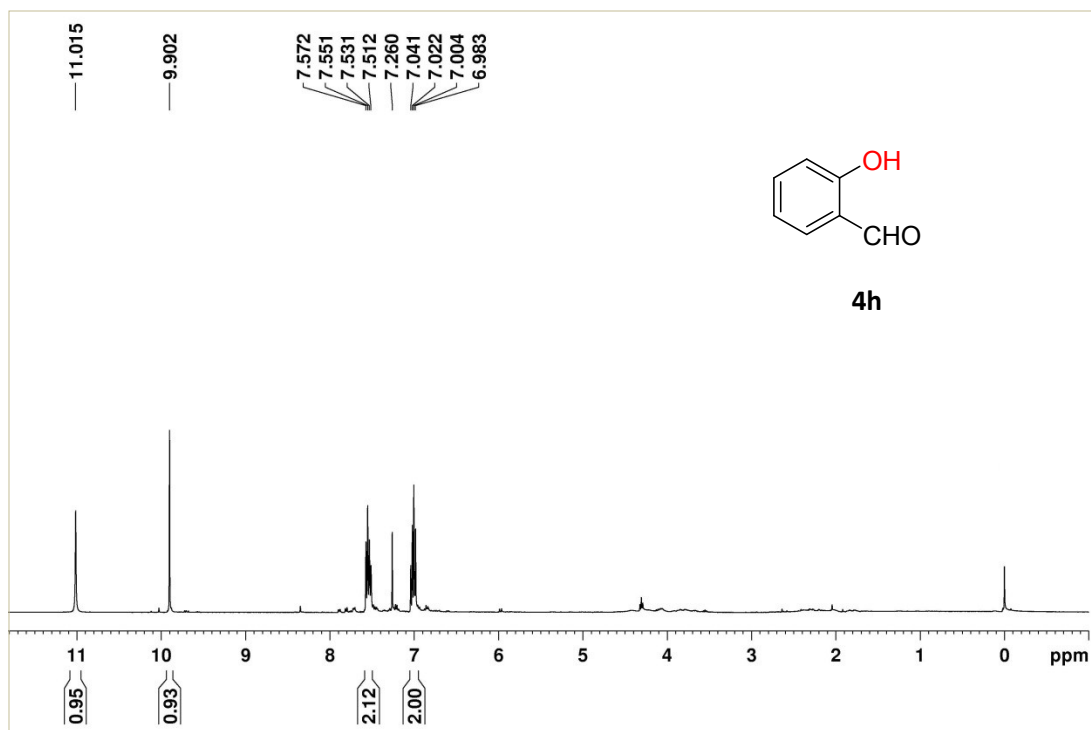

400 MHz <sup>1</sup>H NMR spectrum of **4h** in CDCl<sub>3</sub>

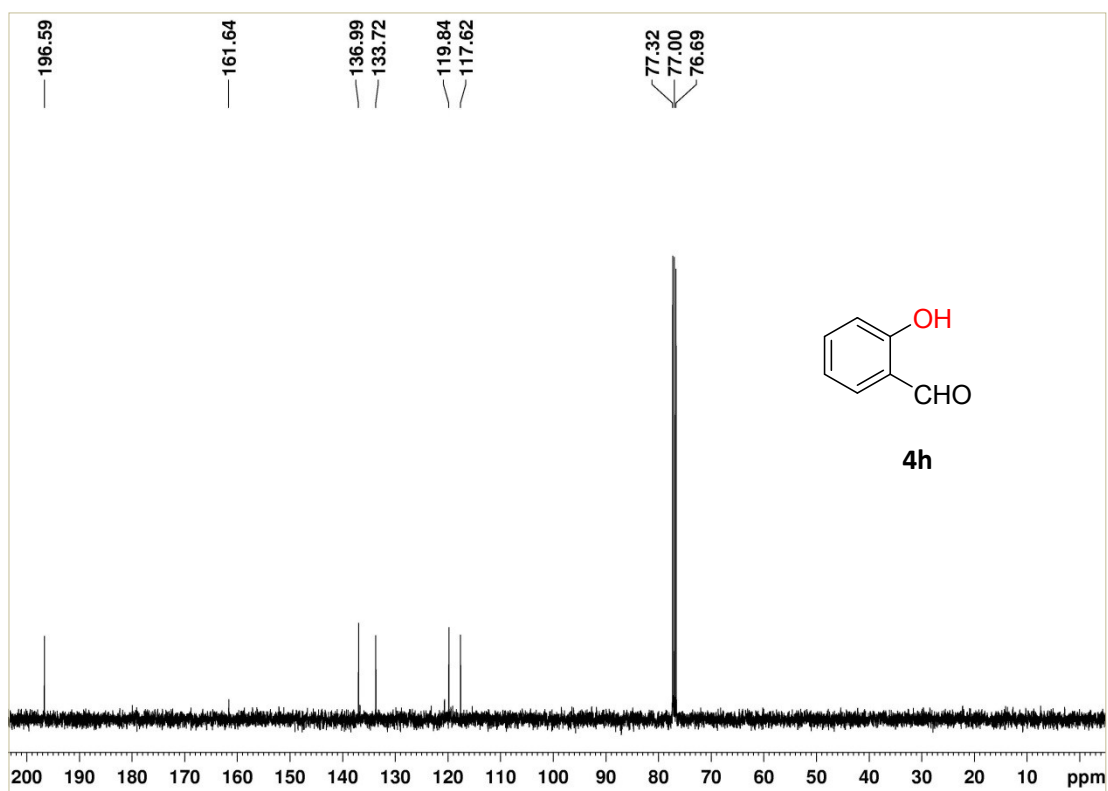

100 MHz <sup>13</sup>C-NMR spectrum of **4h** in CDCl<sub>3</sub>



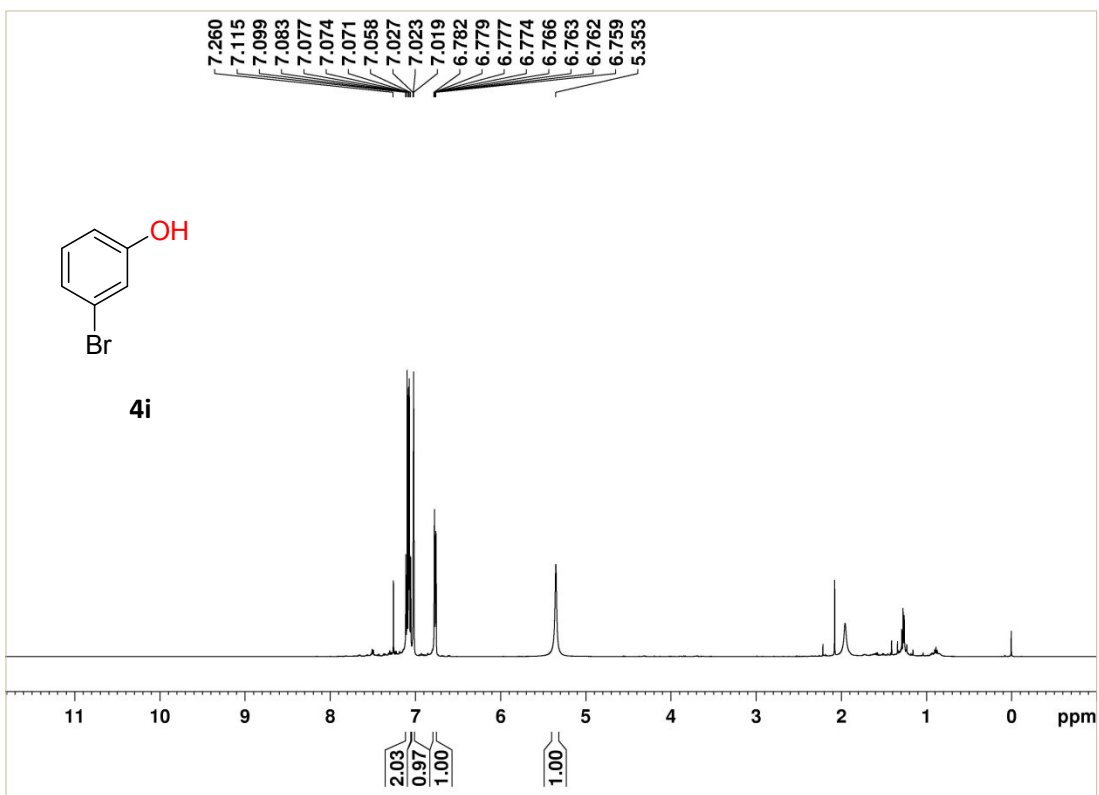

500 MHz  $^1\text{H}$  NMR spectrum of **4i** in  $\text{CDCl}_3$

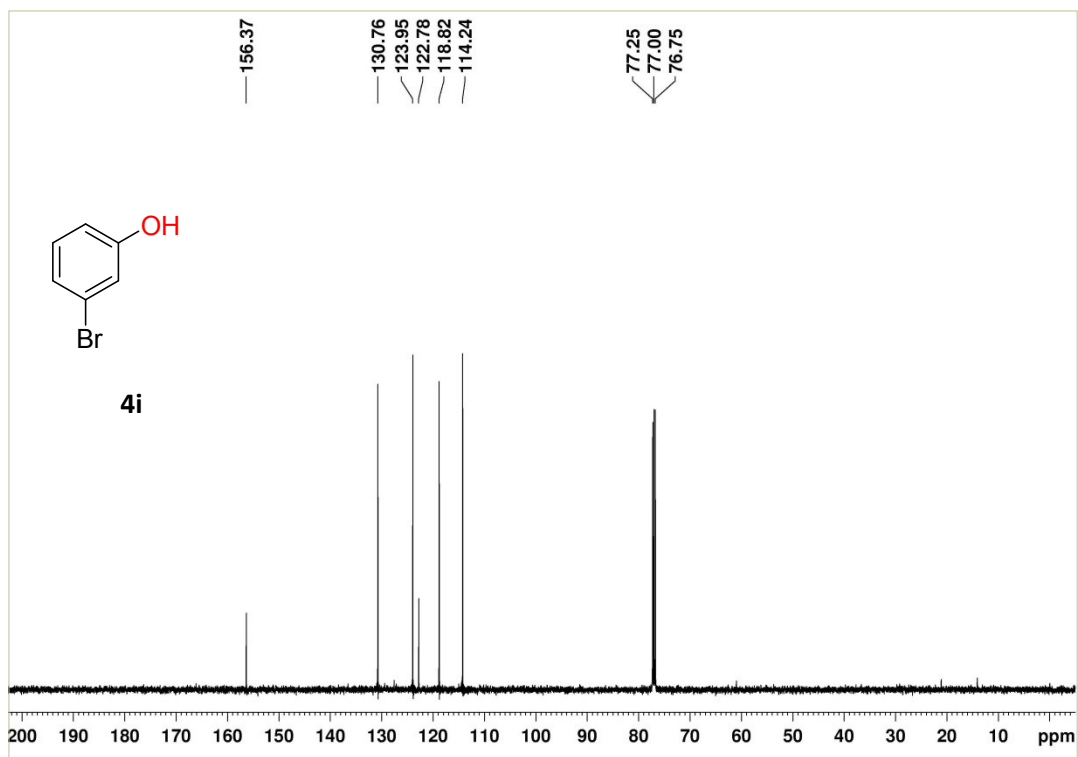

125 MHz  $^{13}\text{C}$ -NMR spectrum of **4i** in  $\text{CDCl}_3$

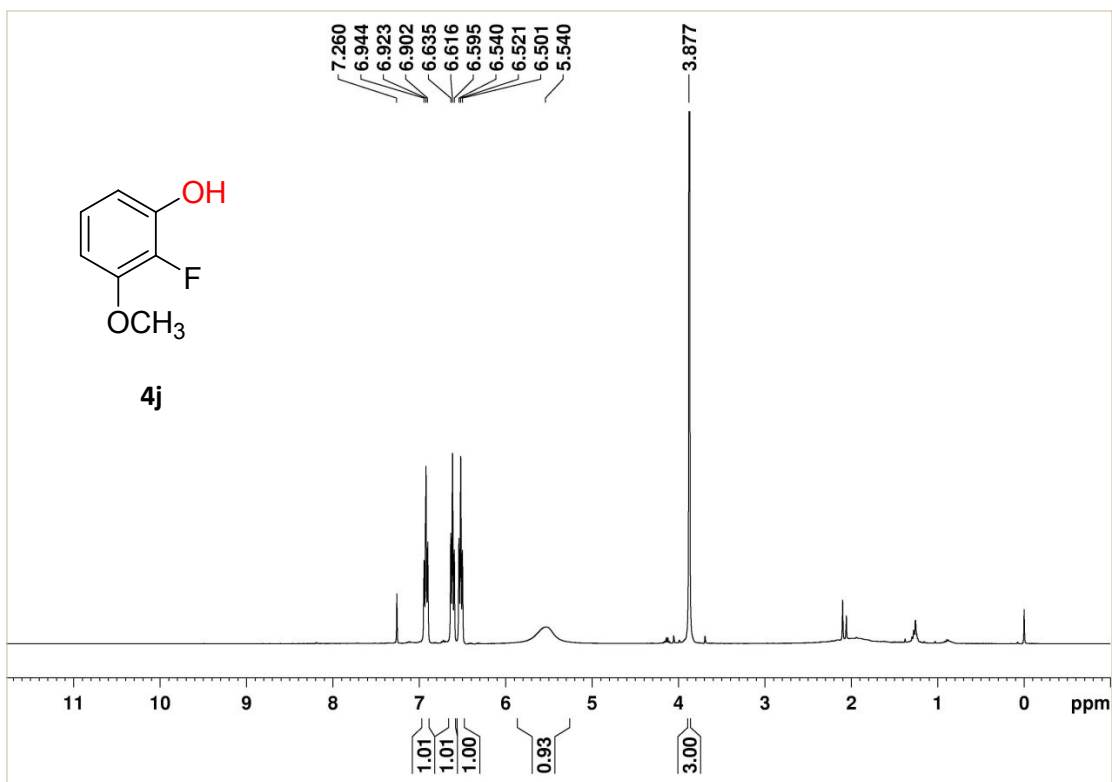

400 MHz  $^1\text{H}$  NMR spectrum of **4j** in  $\text{CDCl}_3$

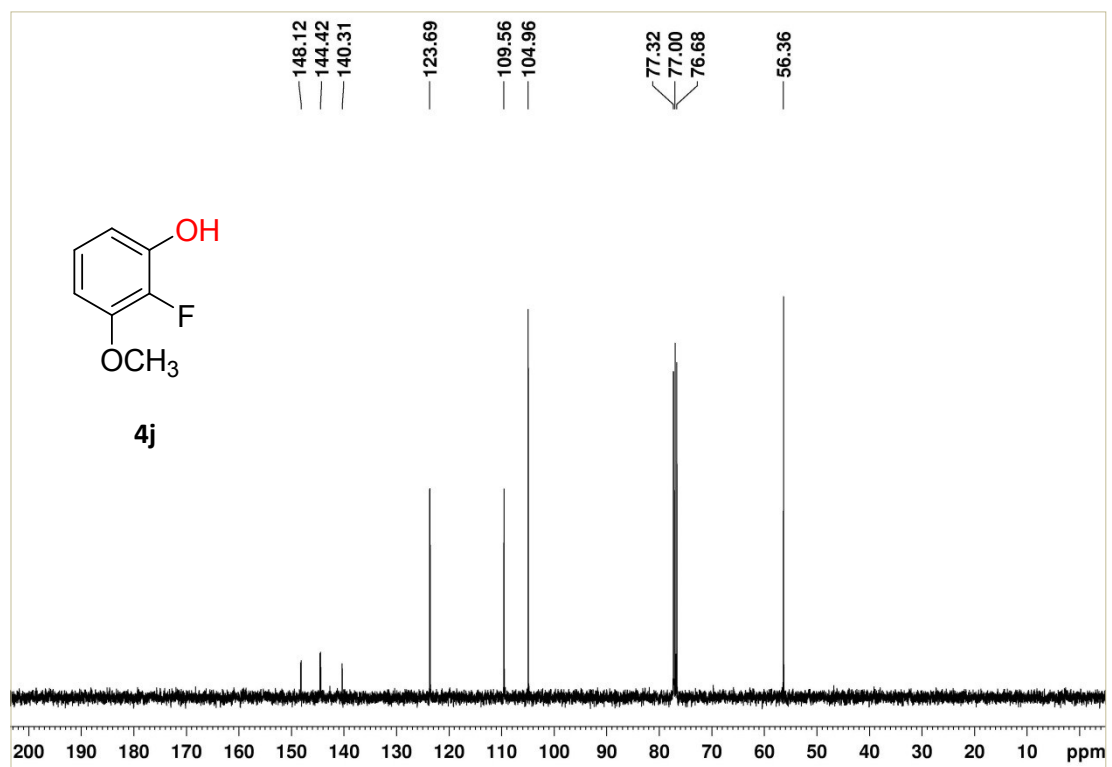

100 MHz  $^{13}\text{C}$ -NMR spectrum of **4j** in  $\text{CDCl}_3$

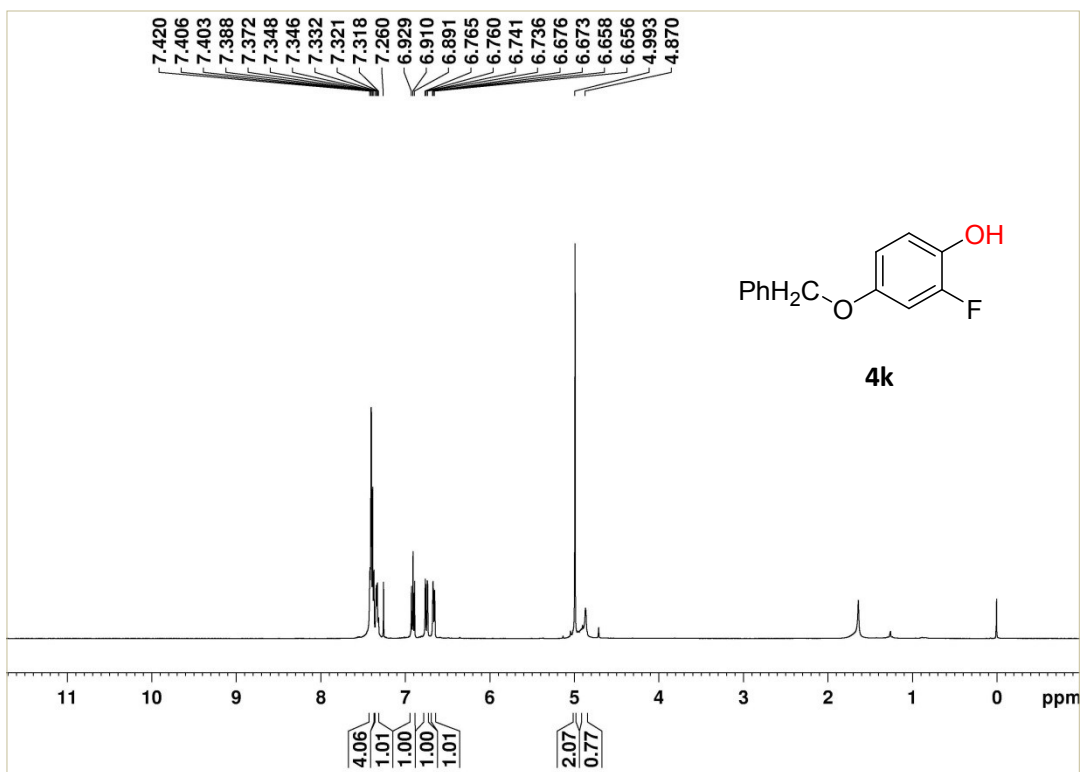

500 MHz  $^1\text{H}$  NMR spectrum of **4k** in  $\text{CDCl}_3$

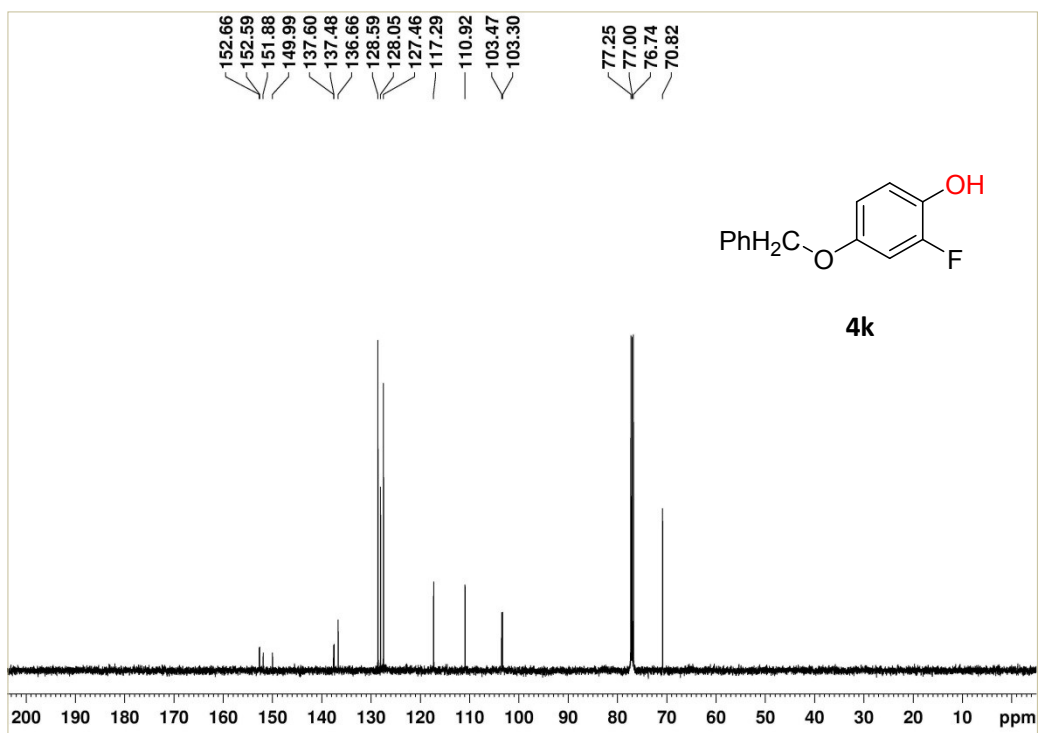

125 MHz  $^{13}\text{C}$ -NMR spectrum of **4k** in  $\text{CDCl}_3$

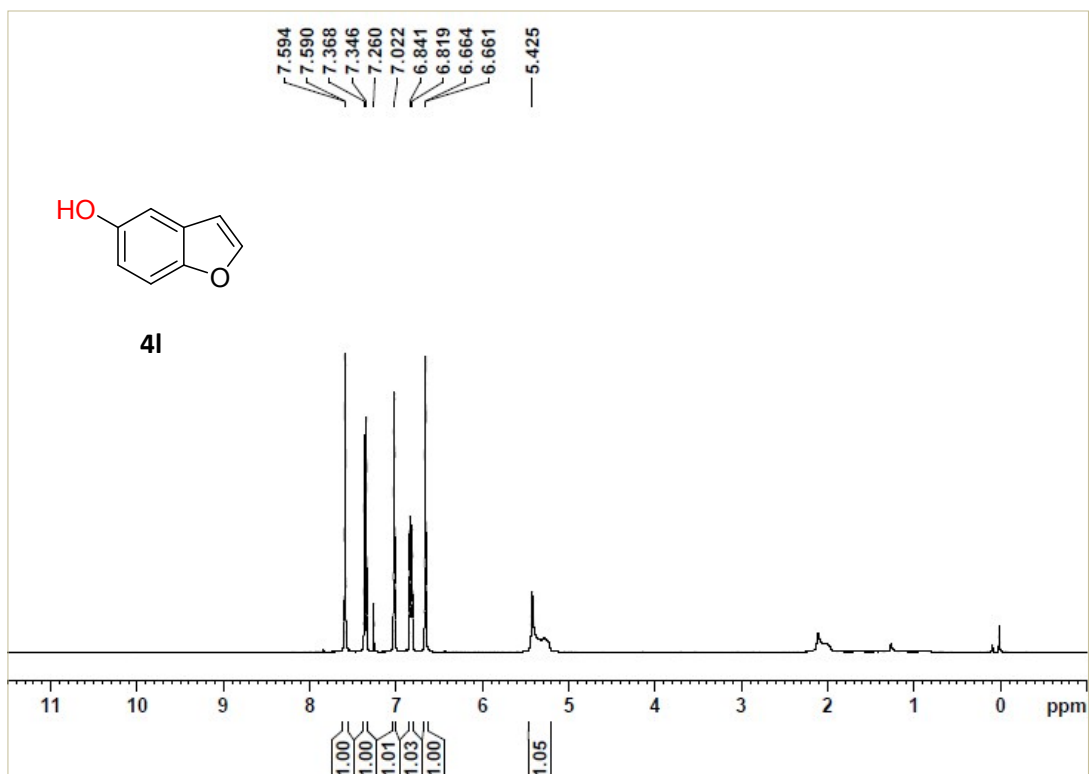

400 MHz  $^1\text{H}$  NMR spectrum of **4I** in  $\text{CDCl}_3$

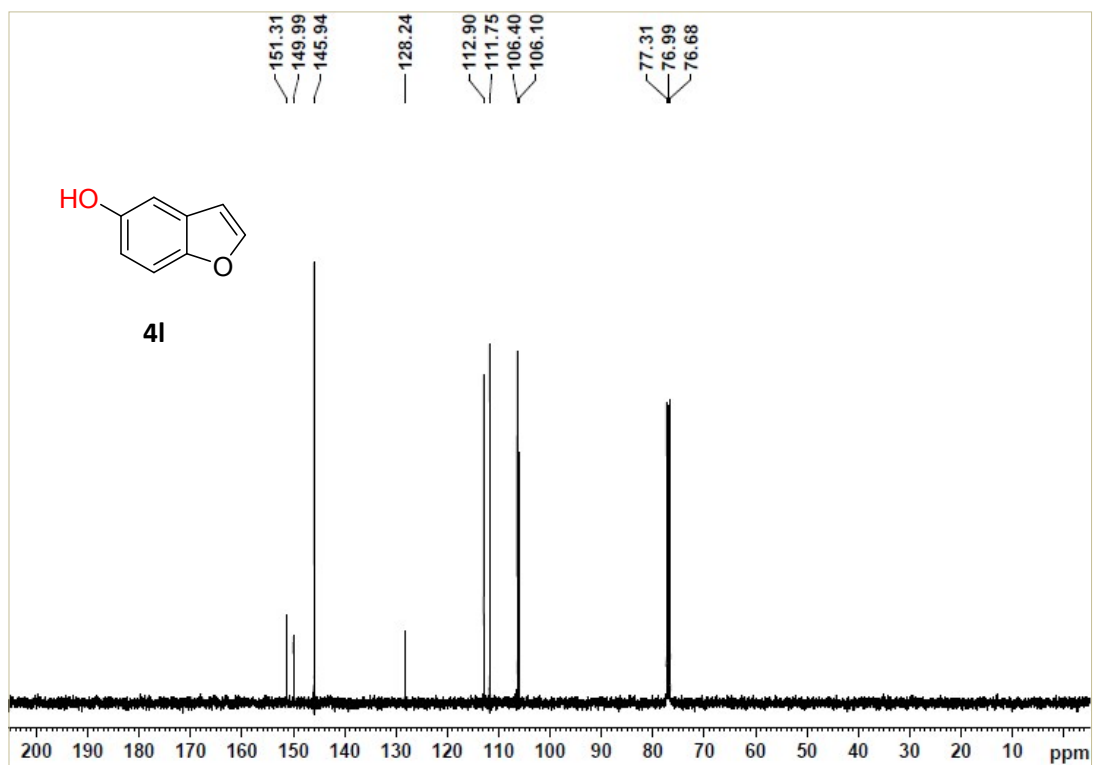

100 MHz  $^{13}\text{C}$ -NMR spectrum of **4I** in  $\text{CDCl}_3$

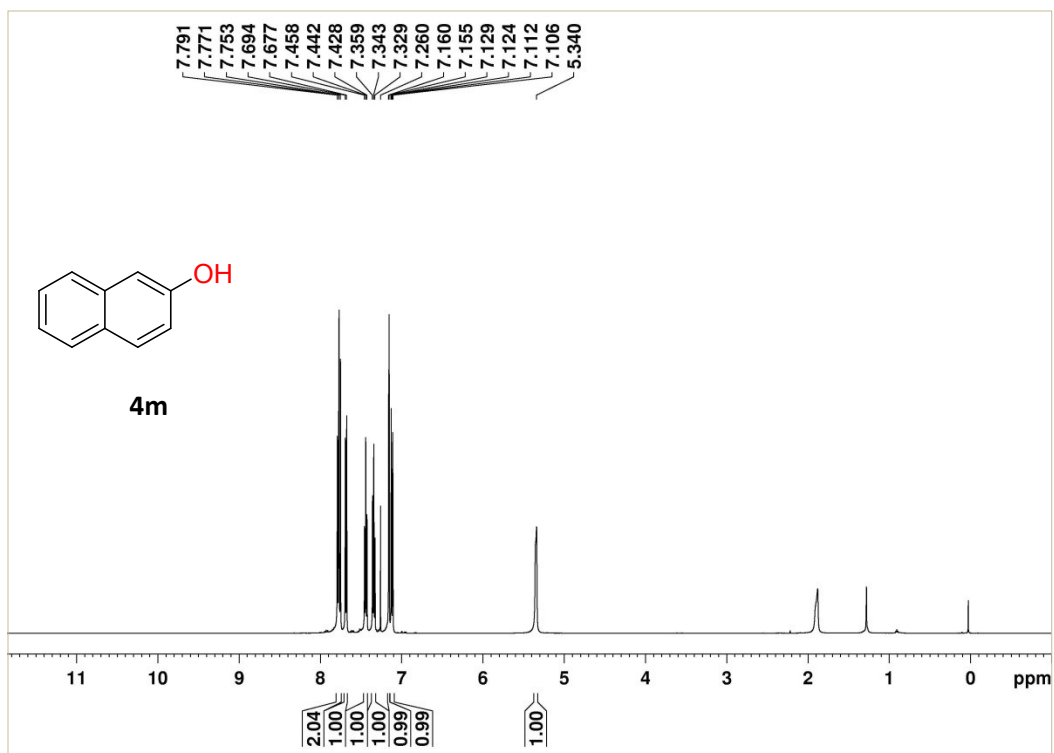

500 MHz  $^1\text{H}$  NMR spectrum of **4m** in  $\text{CDCl}_3$

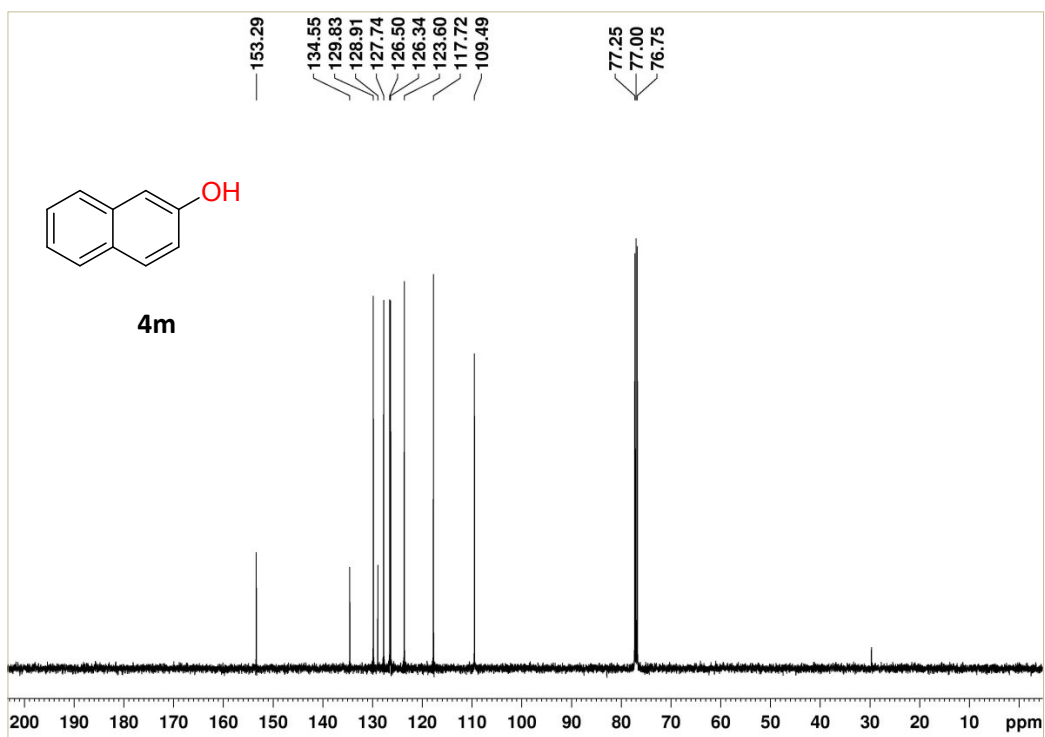

125 MHz  $^{13}\text{C}$ -NMR spectrum of **4m** in  $\text{CDCl}_3$

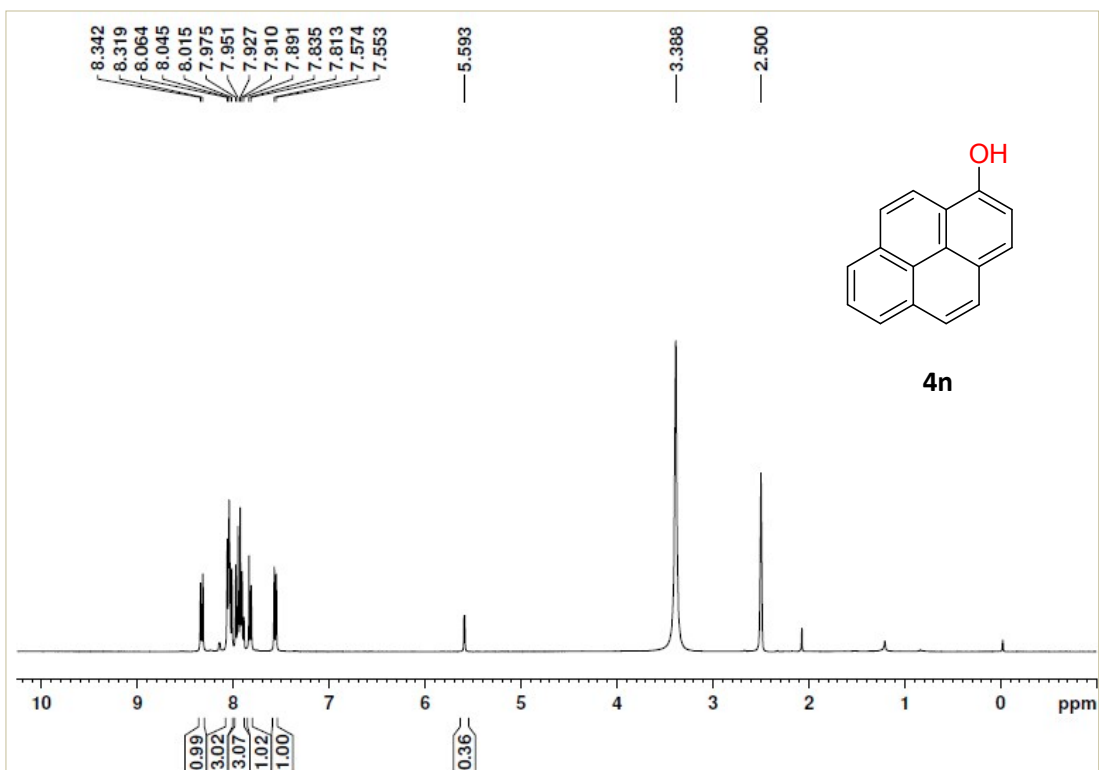

400 MHz  $^1\text{H}$  NMR spectrum of **4n** in DMSO  $-d_6$

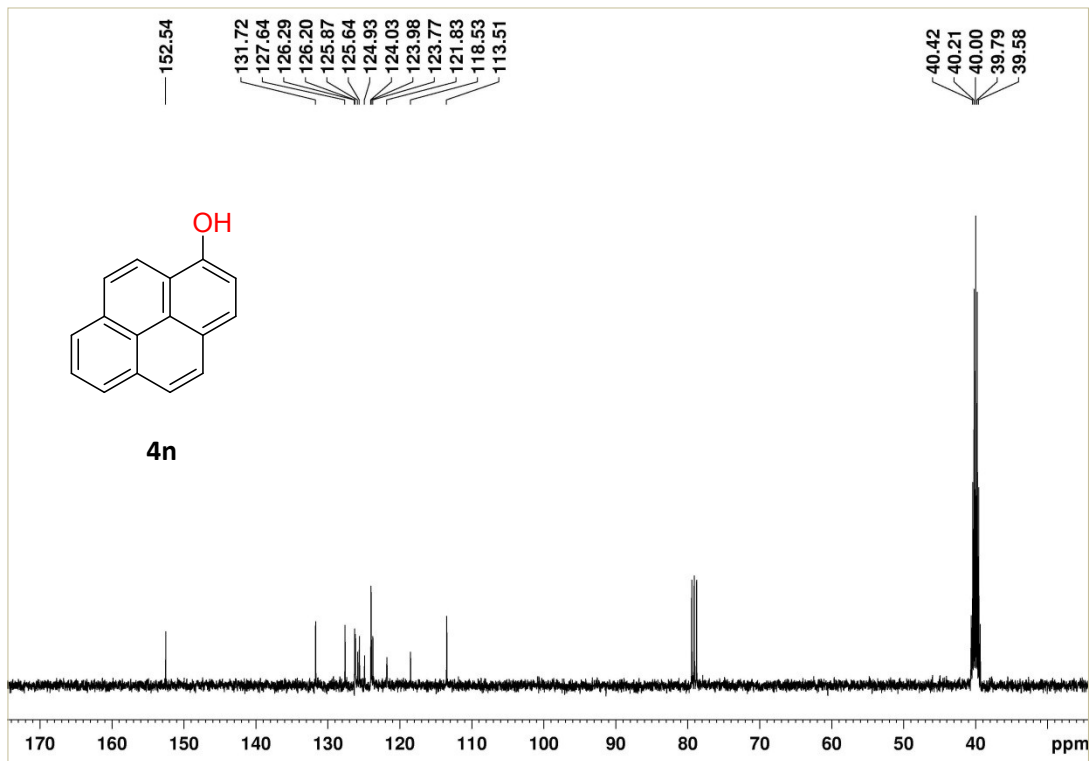

125 MHz  $^{13}\text{C}$  NMR spectrum of **4n** in DMSO  $-d_6$

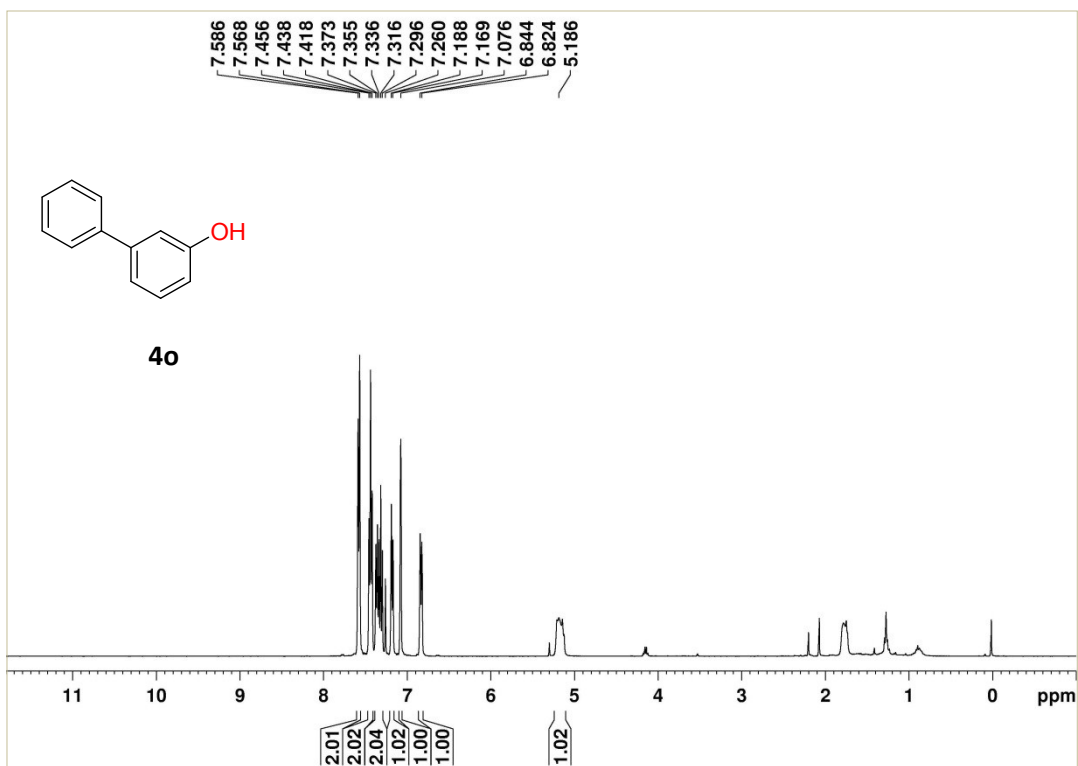

400 MHz  $^1\text{H}$  NMR spectrum of **4o** in  $\text{CDCl}_3$

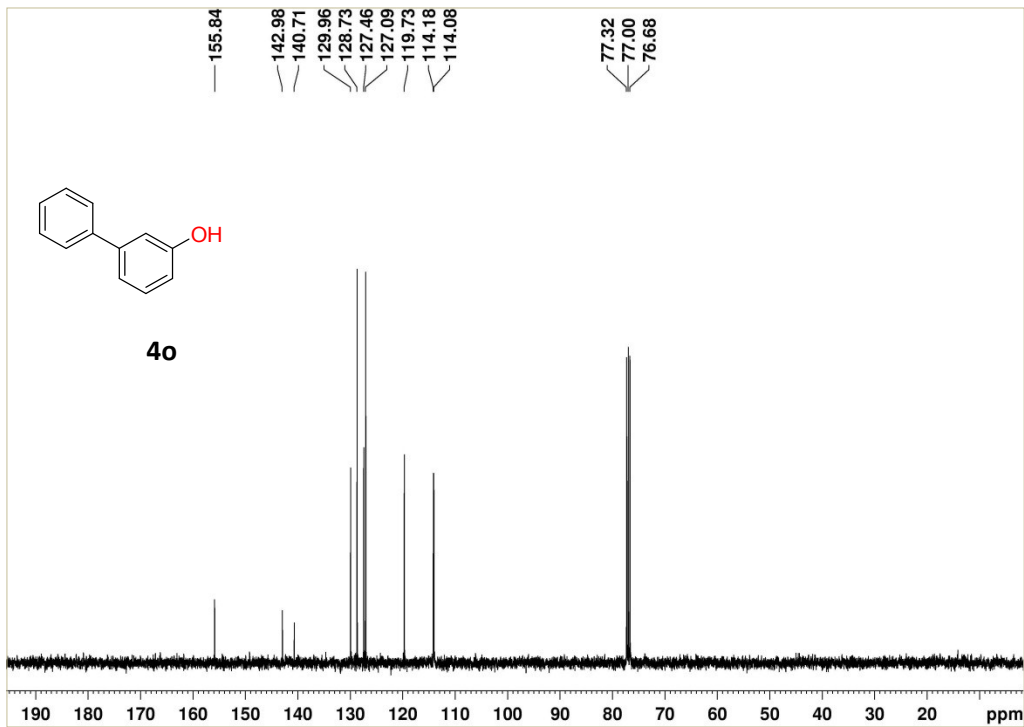

100 MHz  $^{13}\text{C}$ -NMR spectrum of **4o** in  $\text{CDCl}_3$
